31 **Abstract:**

32 The endothelium responds to a multitude of chemical and mechanical factors in regulating  
33 vascular tone, angiogenesis, blood pressure and blood flow. The endothelial volume regulatory  
34 anion channel (VRAC) has been proposed to be mechano-sensitive, to activate in response to  
35 fluid flow/hydrostatic pressure and putatively regulate vascular reactivity and angiogenesis.  
36 Here, we show that the Leucine Rich Repeat Containing Protein 8a, LRRC8a (SWELL1)  
37 functionally encodes VRAC in human umbilical vein endothelial cells (HUVECs). Endothelial  
38 SWELL1 (SWELL1) expression positively regulates AKT-eNOS signaling while negatively  
39 regulating mTOR signaling, via a SWELL1-GRB2-Cav1-eNOS signaling complex. Endothelium-  
40 restricted SWELL1 KO (SWELL1 KO) mice exhibit enhanced tube formation from ex-vivo aortic  
41 ring explants in matrigel angiogenesis assays, develop hypertension in response to chronic  
42 angiotensin II infusion and have impaired retinal blood flow with both diffuse and focal blood  
43 vessel narrowing in the setting of Type 2 diabetes (T2D). These data demonstrate that SWELL1  
44 antithetically regulates AKT-eNOS and mTOR signaling in endothelium and is required for  
45 maintaining vascular function, particularly in the setting of T2D.

46

## 47 **Introduction**

48

49 The endothelium integrates mechanical and chemical stimuli to regulate vascular tone,  
50 angiogenesis, blood flow and blood pressure(1). Endothelial cells express a variety of  
51 mechanosensitive ion channels that regulate vascular function(2), including TRPV4(3-6) and  
52 Piezo1(7-9). The volume-regulated anion current (VRAC) is also prominent in endothelium, has  
53 been proposed to be mechano-sensitive(10), to activate in response to fluid flow/hydrostatic  
54 pressure(11) and putatively regulate vascular reactivity. However, the molecular identity of this  
55 endothelial ion channel has remained a mystery for nearly two decades.

56

57 *SWELL1* or *LRRC8a* (Leucine-Rich Repeat Containing Protein 8a) encodes a transmembrane  
58 protein first described as the site of a balanced translocation in an immunodeficient child with  
59 agammaglobulinemia and absent B-cells(12, 13). Subsequent work revealed the mechanism for  
60 this condition to be due to impaired SWELL1-dependent GRB2-PI3K-AKT signaling in  
61 lymphocytes, resulting in a developmental block in lymphocyte differentiation(14). Thus, for ~11  
62 years, SWELL1 was conceived of as a membrane protein that regulates PI3K-AKT mediated  
63 lymphocyte function(12, 13). Although SWELL1 had been predicted to form a hetero-hexameric  
64 ion channel complex with other LRRC8 family members(15), it was not until 2014 that  
65 SWELL1/LRRC8a was shown to form an essential component of the volume-regulated anion  
66 channel (VRAC)(16, 17), forming hetero-hexamers with LRRC8b-e(17, 18). Therefore,  
67 historically, SWELL1-LRRC8 complex was first described as a membrane protein that signaled  
68 via protein-protein interactions and then later found to form an ion channel signaling complex.

69

70 We showed previously that SWELL1 (LRRC8a) is an essential component of VRAC in  
71 adipocytes that is required for insulin-PI3K-AKT2 signaling to mediate adipocyte hypertrophy  
72 and systemic glucose homeostasis(19-21). The PI3K-AKT-eNOS signaling pathway is central to

73 transducing both mechanical stretch(22) and hormonal inputs (insulin) to regulate endothelial  
74 nitric oxide synthase (eNOS) expression and activity, which, in turn regulates vasodilation  
75 (blood flow and pressure), inhibits leukocyte aggregation, and limits proliferation of vascular  
76 smooth muscle cells (atherosclerosis). Indeed, insulin resistance is thought to be a systemic  
77 disorder in the setting of Type 2 diabetes (T2D), affecting endothelium in addition to traditional  
78 metabolically important tissues, such as adipose, liver, and skeletal muscle(23-25). In fact,  
79 insulin resistant endothelium and the resultant impairment in PI3K-AKT-eNOS signaling has  
80 been proposed to underlie much of the endothelial dysfunction observed in the setting of obesity  
81 and T2D, predisposing to hypertension, atherosclerosis and vascular disease(23-25).

82

83 In this study, we demonstrate that VRAC is SWELL1-dependent in endothelium, associates with  
84 GRB2, caveolin-1 (Cav1), endothelial nitric oxide synthase (eNOS), and regulates PI3K-AKT-  
85 eNOS, ERK1/2 and mTOR signaling – suggesting that SWELL1-LRRC8 channel complexes link  
86 insulin and mechano-signaling in endothelium. SWELL1-dependent AKT-eNOS, ERK1/2 and  
87 mTOR signaling influences angiogenesis, blood pressure and vascular function *in vivo*, while  
88 impaired endothelial SWELL1-LRRC8 signaling predisposes to vascular dysfunction in the  
89 setting of diet-induced T2D.

90

91 **Results**

92 **SWELL1 functionally encodes VRAC in endothelium**

93 The volume-regulatory anion current (VRAC) has been measured and characterized in  
94 endothelial cells for decades but the molecular identity of this endothelial ion channel remains  
95 elusive(10, 11, 26). To determine if the leucine-rich repeat containing membrane protein  
96 SWELL1 (LRRC8a) recently identified in cell lines (16, 17) is required for VRAC in endothelial  
97 cells, as it is in adipocytes (19), pancreatic  $\beta$ -cells (27, 28), nodose neurons (29) and  
98 spermatozoa (30), we first confirmed robust SWELL1 protein expression by Western blot  
99 (**Figure 1A**) and immunostaining (**Figure 1B**) in human umbilical vein endothelial cells  
100 (HUVECs). SWELL1 protein expression is substantially reduced upon adenoviral transduction  
101 with a short-hairpin RNA directed to SWELL1 (Ad-shSWELL1-mCherry) as compared to a  
102 scrambled control (Ad-shSCR-mCherry). Next, we measured hypotonically-induced (210  
103 mOsm) endothelial VRAC currents in HUVECs. These classic outwardly rectifying hypotonically-  
104 induced VRAC currents are prominent in HUVECs, largely blocked by the VRAC inhibitor 4-(2-  
105 Butyl-6,7-dichloro-2-cyclopentyl-indan-1-on-5-yl) oxobutyric acid (DCPIB; **Figure 1C&D**), and  
106 significantly suppressed upon shSWELL1-mediated SWELL1 knock-down (**Figure 1E&F**),  
107 consistent with SWELL1 functionally encoding endothelial VRAC.

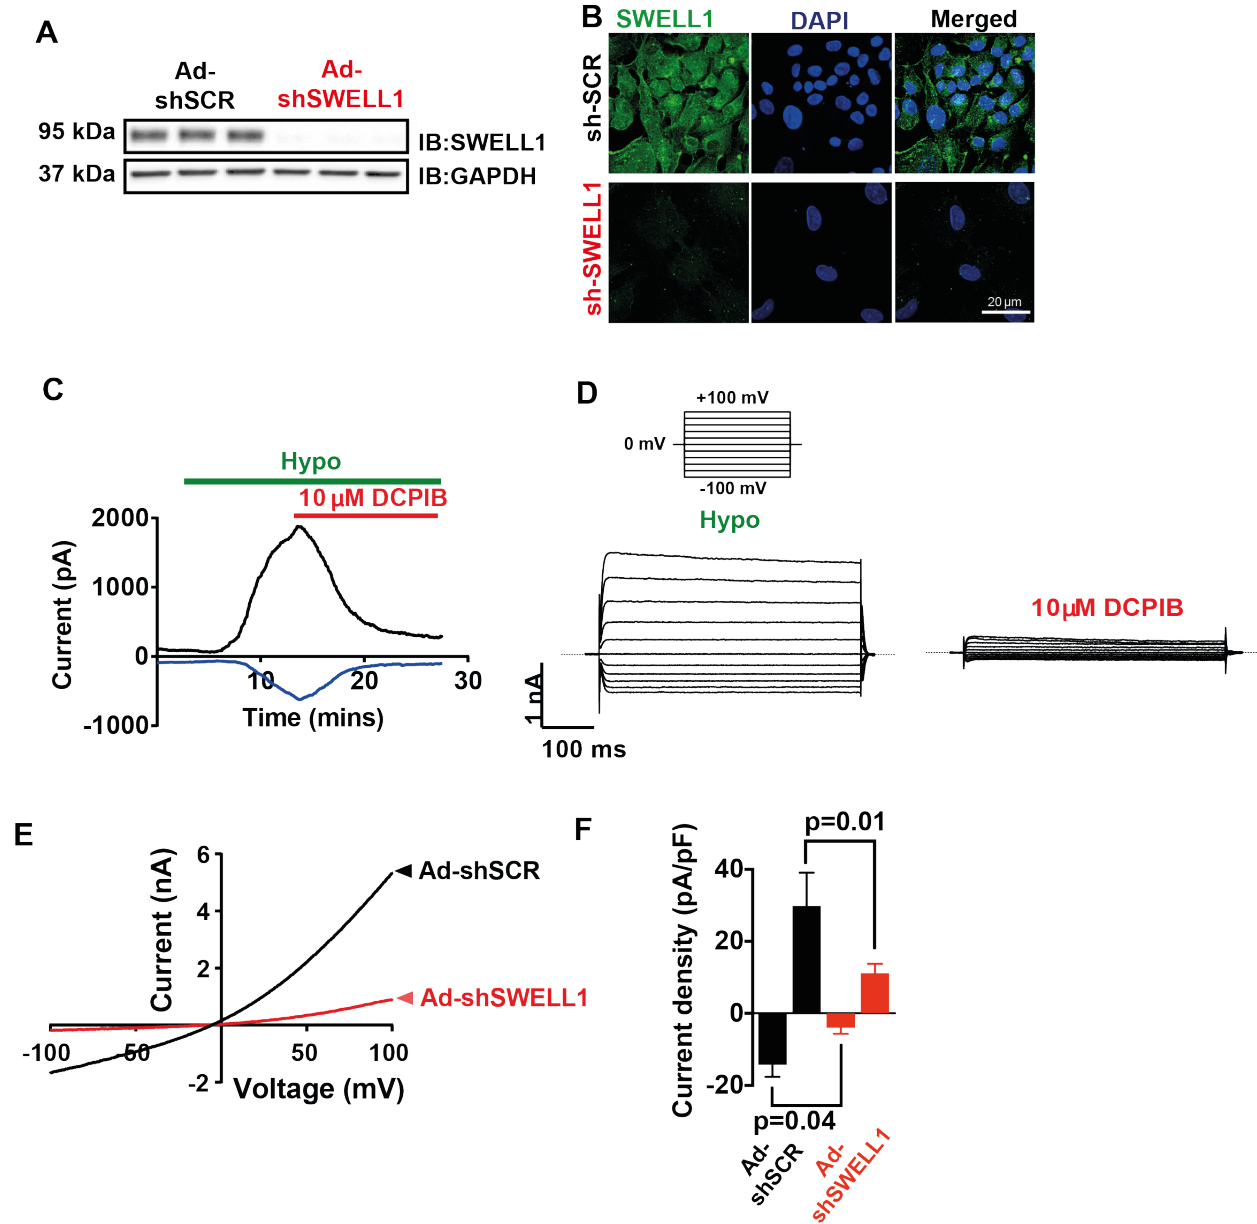

108

109 **Figure 1. SWELL1 mediates VRAC currents in human umbilical vein endothelial cells (HUVECs).**

110 **A**, SWELL1 western blot in HUVECs transduced with adenovirus expressing a short hairpin RNA  
 111 directed to SWELL1 (Ad-shSWELL1) compared to control scrambled short hairpin RNA (Ad-shSCR).  
 112 GAPDH is used as loading control. **B**, Immunofluorescence staining of the HUVECs transduced with Ad-  
 113 shSWELL1 and Ad-shSCR. **C**, Current-time relationship of VRAC (hypotonic, 210 mOsm) in Ad-shSCR  
 114 transduced HUVEC and co-application of 10 μM DCPIB. **D**, Representative current traces upon hypotonic  
 115 activation (left) during voltage steps (from -100 to +100 mV, shown in inset) and inhibition by DCPIB  
 116 (right). **E**, Current-voltage relationship of VRAC during voltage ramps from -100 mV to +100 mV after  
 117 hypotonic swelling in HUVECs transduced with Ad-shSCR and Ad-shSWELL1. **F**, Mean current outward  
 118 and inward densities at +100 and -100 mV ( $n_{sh-SCR}=4$  cells;  $n_{shSWELL1}=6$  cells). Data are shown as mean  $\pm$   
 119 s.e.m. \* $p < 0.05$ ; \*\* $p < 0.01$ ; unpaired t-test for **F**.

120

121 **SWELL1 regulates PI3K-AKT-eNOS, ERK and mTOR signaling in endothelium**

122 Previous studies in adipocytes demonstrate that SWELL1 regulates insulin-PI3K-AKT signaling,  
123 adipocyte expansion and systemic glycemia, whereby SWELL1 loss-of-function induces an  
124 insulin-resistant pre-diabetic state (19, 20). Insulin signaling is also important in regulating  
125 endothelium and vascular function (24, 25, 31). Moreover, insulin-resistance in Type 2 diabetes  
126 (T2D) is considered a systemic disorder and insulin-resistant endothelium is postulated to  
127 underlie impaired vascular function in T2D (24, 25). As SWELL1 is highly expressed in  
128 endothelium (**Figure 1**), and PI3K-AKT-eNOS signaling critical for endothelium-dependent  
129 vascular function(32), we next examined AKT-eNOS, ERK1/2 and mTOR signaling in SWELL1  
130 KD compared to control HUVECs under basal conditions. Basal phosphorylated AKT2 (pAKT2,  
131 **Figure 2A&D**), pAKT1 (**Figure 2A&E**), p-eNOS (**Figure 2A&C**), pERK1/2 (**Figure 2A&F**) are  
132 abrogated in HUVECs upon SWELL1 KD, indicating that SWELL1 contributes to AKT-eNOS,  
133 and ERK signaling in endothelium. Curiously, basal pS6 ribosomal protein, indicative of mTOR  
134 signaling, is augmented in SWELL1 KD HUVECs compared to control (**Figure 2A&G**),  
135 suggesting SWELL1 to be a negative regulator of mTOR in endothelium. As a complementary  
136 approach, we used siRNA mediated SWELL1 knock-down using a silencer select siRNA  
137 targeting SWELL1 mRNA with a different sequence from shSWELL1. siRNA mediated SWELL1  
138 KD in HUVECs yielded nearly identical results to the shRNA KD approach (**Figure 2-Figure**  
139 **Supplement 1**). In summary, SWELL1 expression level regulates AKT, eNOS, ERK and mTOR  
140 signaling in endothelium.

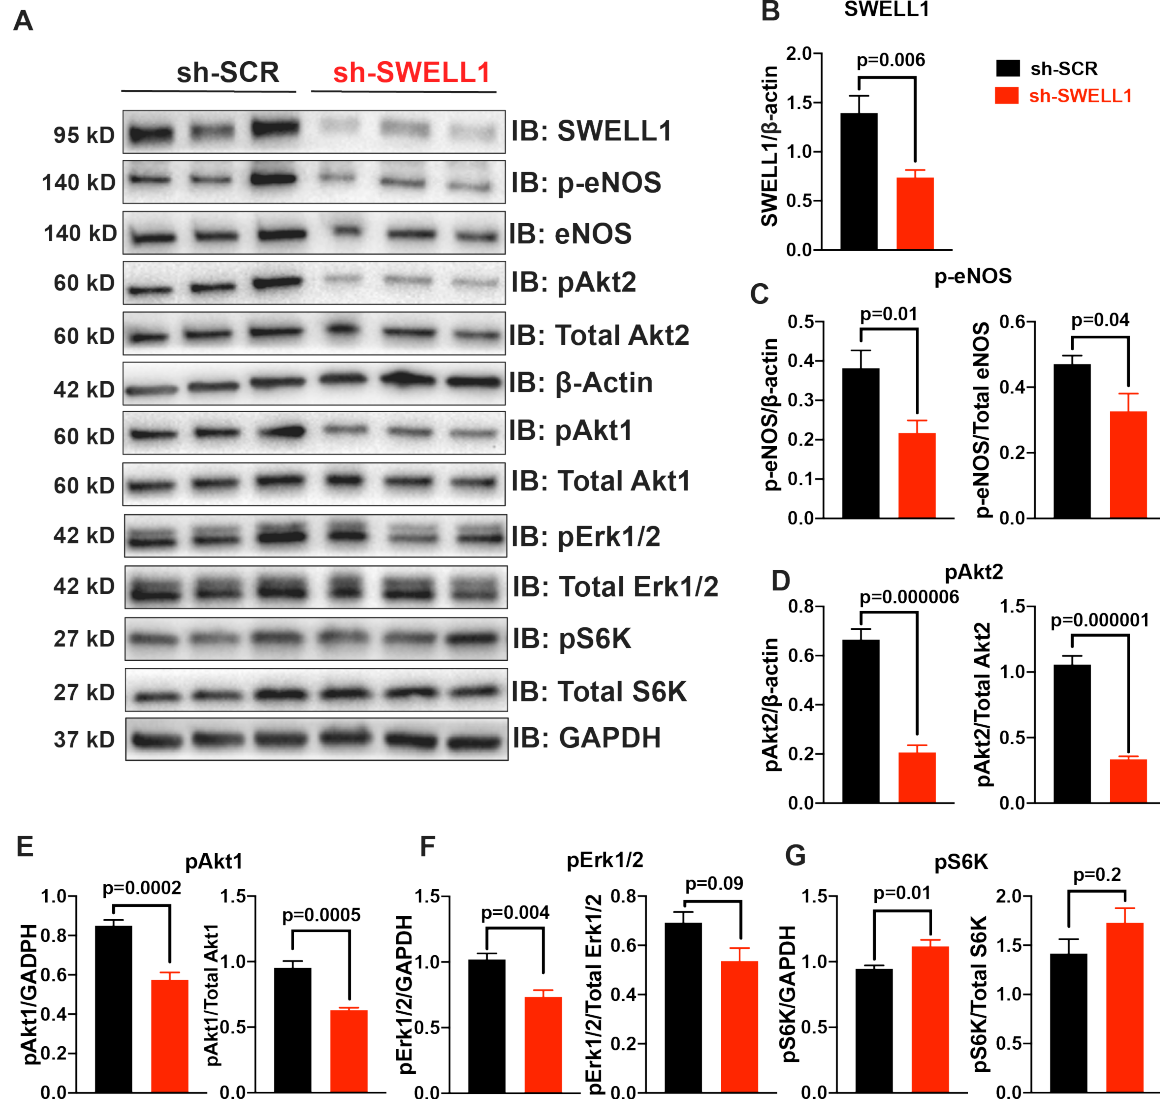

141

142

**Figure 2. SWELL1 regulates PI3K-AKT-eNOS, ERK and mTOR signaling in endothelium.**

143

144

145

146

147

148

149

150

(A), Western blots of SWELL1, pAkt2, pAkt1, Akt2, Akt1, pErk1/2, Erk1/2, p-eNOS, eNOS, pS6K ribosomal protein, S6K ribosomal protein, GAPDH, and  $\beta$ -Actin in Ad-shSCR and Ad-shSWELL1 transduced HUVECS under basal conditions. Quantification of SWELL1/ $\beta$ -actin (B), p-eNOS/ $\beta$ -actin, p-eNOS/Total eNOS (C), pAkt2/ $\beta$ -actin, pAkt2/Total Akt2 (D), pAkt1/GAPDH, pAkt1/Total Akt1 (E), pERK1/2 /GAPDH, pErk1/2 /Total Erk1/2 (F), pS6 ribosomal protein/GAPDH, and pS6K ribosomal protein/Total S6K ribosomal protein (G). N=6 independent experiments. Significance between the indicated groups in all blots were calculated using a two-tailed Student's t-test. P-values are illustrated on figures. Error bars represent mean  $\pm$  s.e.m.



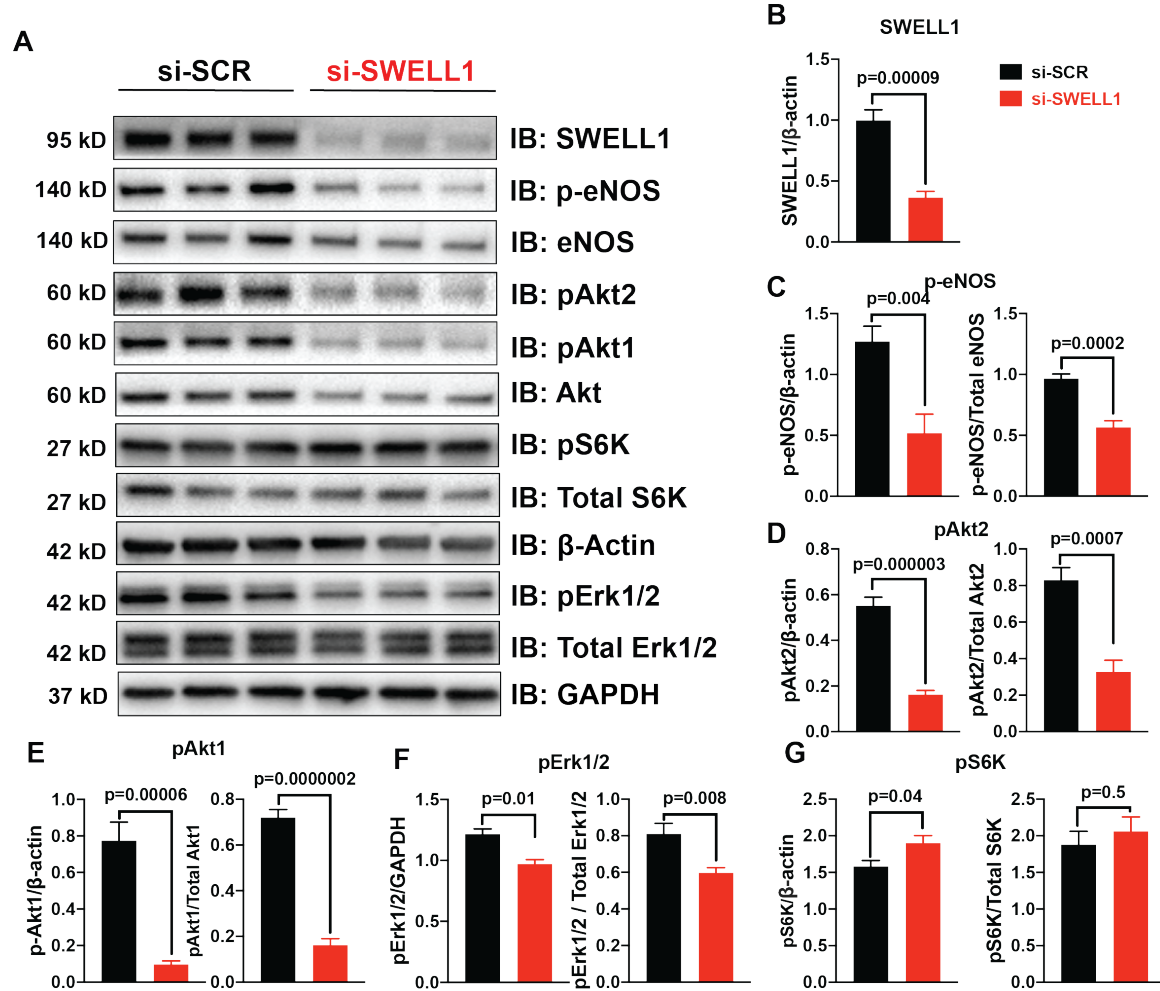

151

152 **Figure 2- Figure Supplement 1. SWELL1 regulates PI3K-AKT-eNOS, ERK and mTOR signaling in**  
 153 **endothelium.**

154 **(A)**, Western blots of SWELL1, pAkt2, pAkt1, Akt, pErk1/2, Erk1/2, p-eNOS, eNOS, pS6K ribosomal  
 155 protein, S6K ribosomal protein, and  $\beta$ -Actin in si-SCR and si-SWELL1 transduced HUVECS under basal  
 156 conditions. Quantification of SWELL1/  $\beta$ -Actin **(B)**, p-eNOS/  $\beta$ -actin, p-eNOS/Total eNOS **(C)**, pAkt2/  
 157  $\beta$ -actin, pAkt2/Total Akt **(D)**, pAkt1/  $\beta$ -actin, pAkt1/Total Akt **(E)**, pERK1/2 /  $\beta$ -actin, pErk1/2 /Total Erk1/2  
 158 **(F)**, pS6 ribosomal protein/  $\beta$ -actin, and pS6K ribosomal protein/Total S6K ribosomal protein **(G)**. N=6  
 159 independent experiments. Significance between the indicated groups in all blots were calculated using a  
 160 two-tailed Student's t-test. P-values are illustrated on figures. Error bars represent mean  $\pm$  s.e.m.

161

162 **SWELL1 interacts with GRB2, Cav1 and eNOS and mediates stretch-dependent eNOS**  
 163 **signaling**

164 In adipocytes, the mechanism of SWELL1-mediated regulation of PI3K-Akt signaling involves

165 SWELL1/GRB2/Cav1 molecular interactions (19). To determine if SWELL1 resides in a similar

166 macromolecular signaling complex in endothelium we immunoprecipitated (IP) endogenous  
167 GRB2 from HUVECs. Upon GRB2 IP, we detect SWELL1 protein in shSCR treated HUVECs  
168 and less SWELL1 upon GRB2 IP from shSWELL1-treated HUVECs, consistent with a SWELL1-  
169 GRB2 interaction (**Figure 3A&B**). In addition, with GRB2 IP we also detect both Cav1 (**Figure**  
170 **3A&B**) and eNOS (**Figure 3B**). These data suggest that endothelial SWELL1 resides in a  
171 signaling complex that includes GRB2, Cav1 and eNOS, consistent with the findings that GRB2  
172 and Cav1 interact, and that Cav1 regulates eNOS via a direct interaction (33-35). Also, GRB2  
173 has been shown to regulate endothelial ERK, AKT and JNK signaling (36). Moreover, these  
174 data are also in-line with the notion that caveoli form mechanosensitive microdomains (37-39)  
175 that regulate VRAC (40, 41) and that VRAC can be activated by mechanical stimuli in a number  
176 of cell types, including endothelium (10, 26, 42-45).

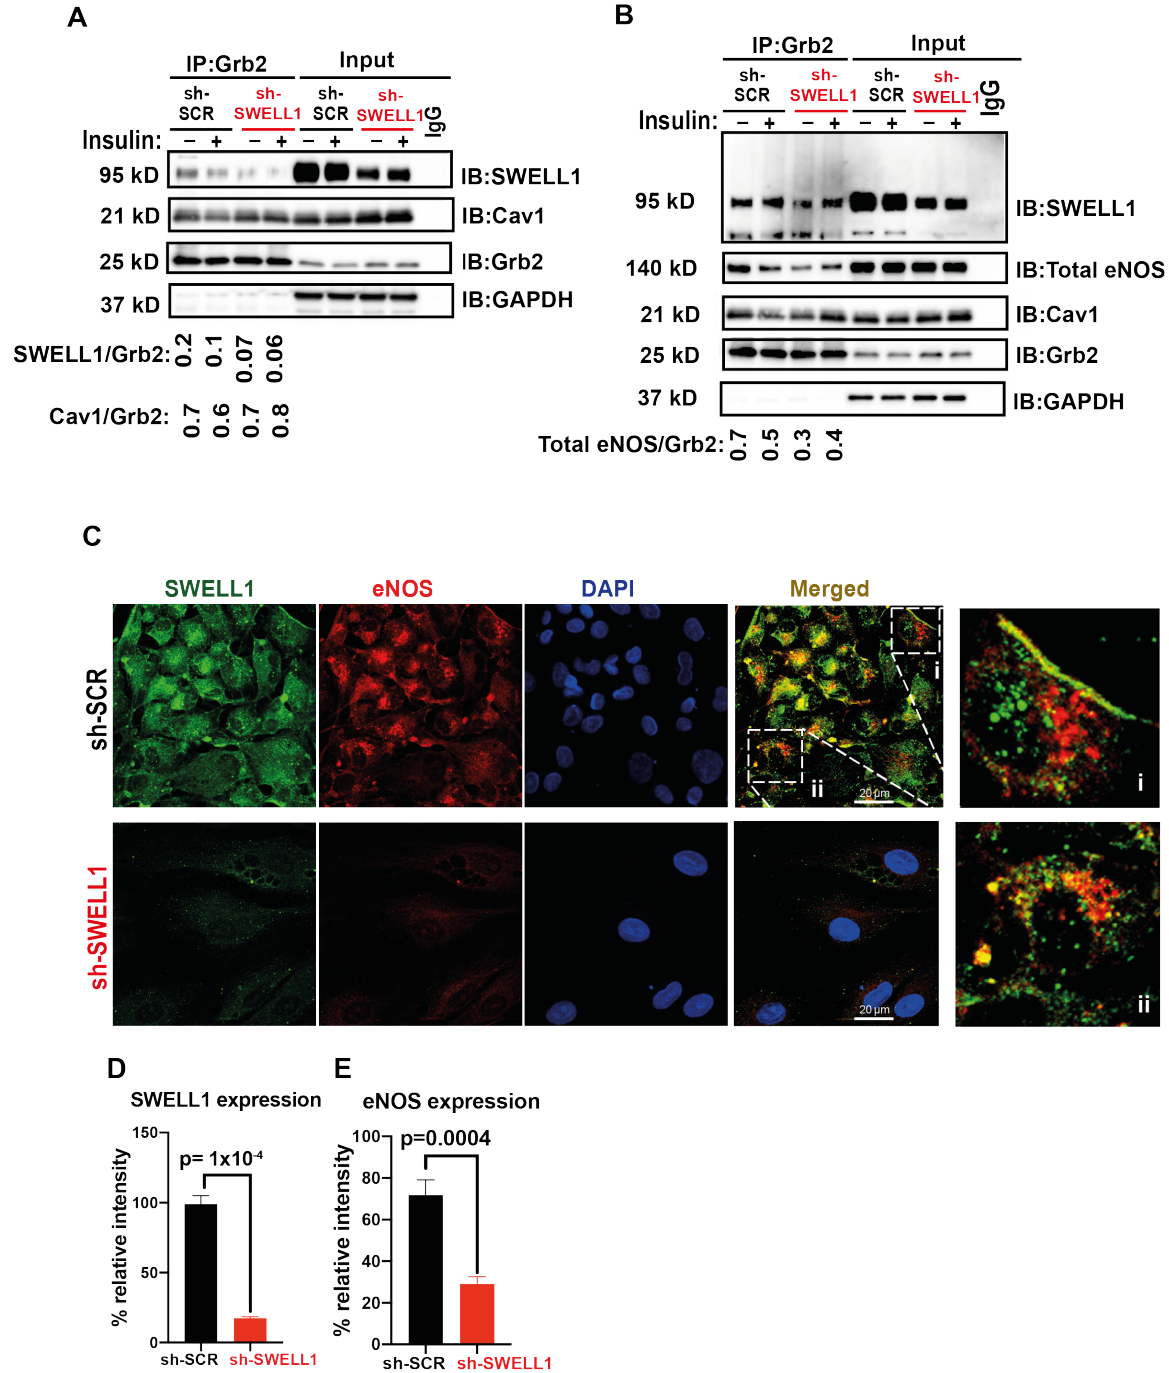

177

178 **Figure 3. SWELL1 interacts with Grb2, Cav1 and eNOS in human endothelium**

179 **A**, GRB2 immunoprecipitation from Ad-shSCR and Ad-shSWELL1 transduced HUVECs and immunoblot  
 180 with SWELL1, Cav1 and GRB2 antibodies. Densitometry values for GRB2 co-immunoprecipitated  
 181 SWELL1 (SWELL1/GRB2) and GRB2 co-immunoprecipitated Cav1 (Cav1/GRB2). GAPDH serves as  
 182 loading control for input samples. **(B)** GRB2 immunoprecipitation from Ad-shSCR and Ad-shSWELL1  
 183 transduced HUVECs and immunoblot with SWELL1, eNOS, Cav1 and GRB2 antibodies. Insulin-  
 184 stimulation with 100 nM insulin for 10 minutes. Densitometry values for GRB2 co-immunoprecipitated  
 185 eNOS (eNOS/GRB2). Representative blots from 3 independent experiments. **(C)** Representative  
 186 endogenous SWELL1 and eNOS immunofluorescence staining in Ad-shSCR and Ad-shSWELL1

187 transduced HUVECs. Representative image from 6 independent experiments. **(D-E)** Quantification of  
188 SWELL1 **(D, n = 6)** and eNOS **(E, n = 6)** immunofluorescence staining upon SWELL1 KD. Evidence of  
189 SWELL1-eNOS colocalization (C, insets) in plasma membrane **(i)** and perinuclear regions **(ii)**.  
190 Significance between the indicated groups are calculated using a two-tailed Student's t-test. P-values are  
191 indicated on figures. Error bars represent mean  $\pm$  s.e.m.  
192

193 We also examined the relationship between SWELL1 and eNOS protein expression and  
194 localization in HUVECs by immunofluorescence (IF) staining (**Figure 3C**). Similar to observed  
195 by Western blot (**Figure 2A, and Figure 2-Figure Supplement 1**), IF staining reveals that  
196 reductions in SWELL1 expression correlate with reduced eNOS expression (**Figure 3C-E,**  
197 **Figure 3-Figure Supplement 1**). Moreover, SWELL1 and eNOS co-localize in plasma  
198 membrane and peri-nuclear intracellular domains (**Figure 3C, inset**), consistent with the IP data  
199 revealing a SWELL1-GRB2-Cav-eNOS interaction (**Figure 3A&B**), and also with previously  
200 described intracellular eNOS localization(46).

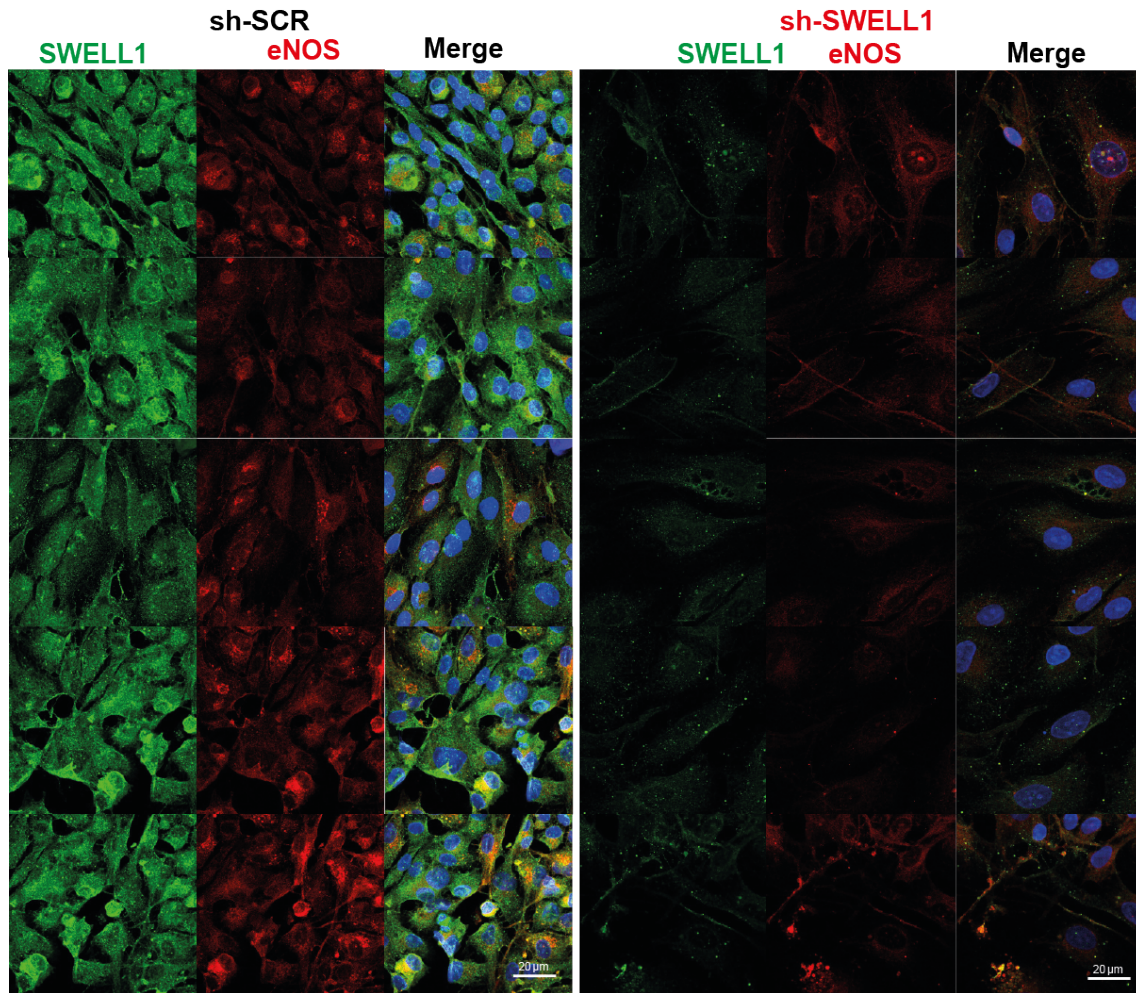

201

202 **Figure 3 - Figure Supplement 1. SWELL1 co-localizes with eNOS and regulates eNOS expression**

203 SWELL1 (green) and eNOS (red) immunofluorescence staining of HUVEC transduced with either Ad-  
204 shSCR or Ad-shSWELL1. Scale bar is 20 μm. DAPI (blue) labels nuclei.

205

206 Given that endothelial cells respond to stretch stimuli to regulate vascular tone via activation of

207 eNOS, we next examined the SWELL1-dependence of stretch-induced AKT, ERK1/2 and eNOS

208 signaling in HUVECs (**Figure 4**). Stretch (5%) is sufficient to stimulate AKT1 and AKT2

209 signaling (**Figure 4A-C**), though not ERK1/2 signaling (**Figure 4D**) in HUVECs, and all are

210 blunted in SWELL1 KD HUVECS (**Figure 4A-D**). Similarly, we observe abrogation of time-

211 dependent p-eNOS signaling with 5% stretch in SWELL1 KD HUVECS compared to control

212 (**Figure 4E&F**). Taken together, these data position SWELL1 as a regulator stretch-mediated

213 PI3K-AKT-eNOS signaling in endothelium via a SWELL1-GRB2-Cav1-eNOS signaling complex.

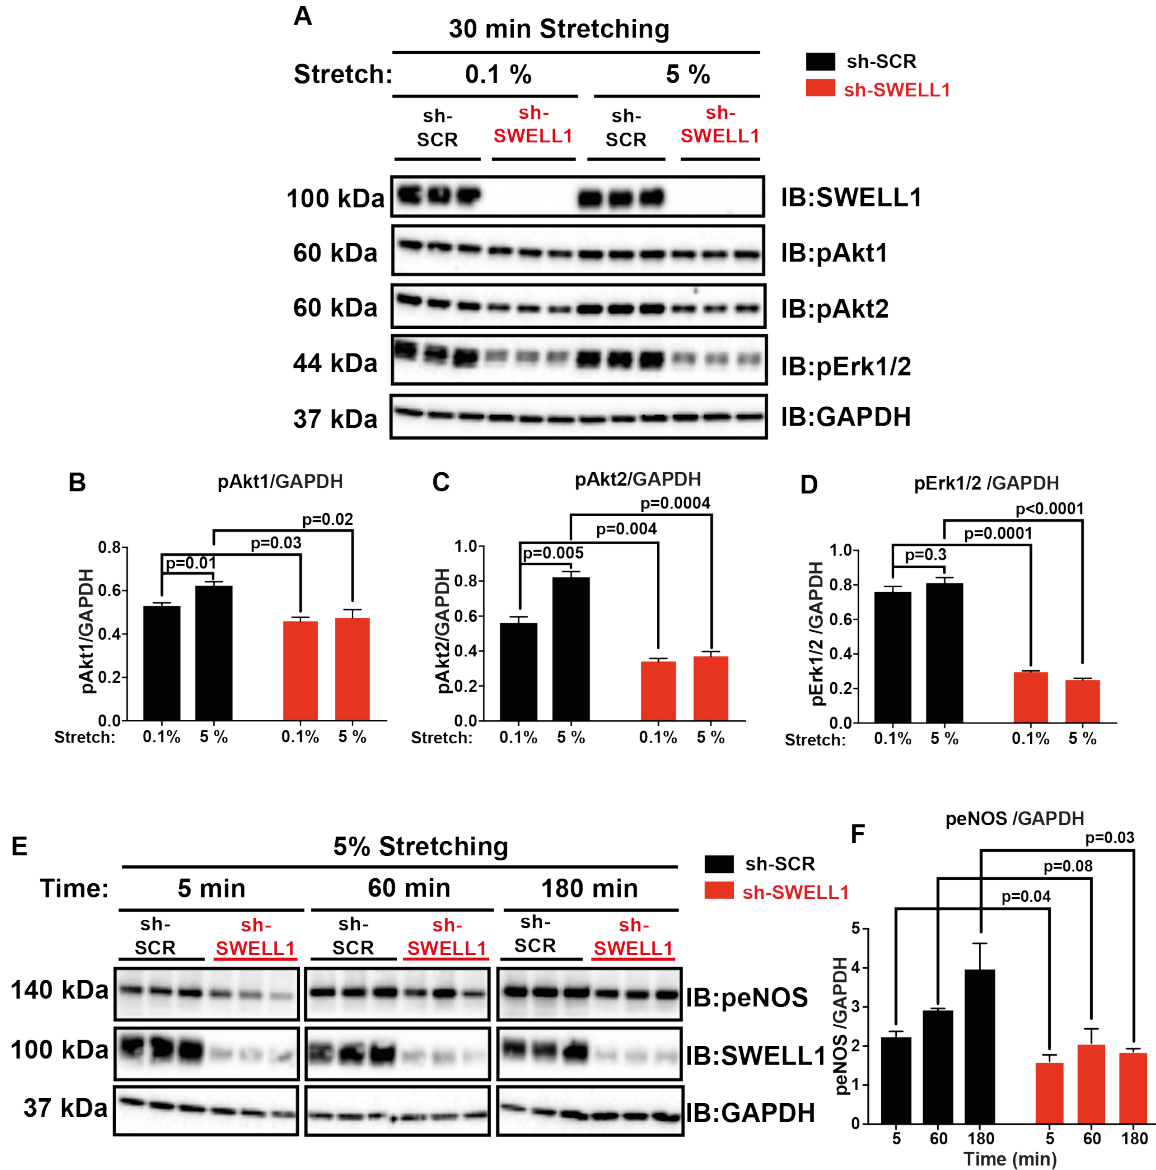

214

215 **Figure 4. SWELL1 is required for intact stretch-induced AKT-eNOS signaling**

216 **A**, Western blot of SWELL1, pAKT1, pAKT2, pERK1/2 in response to 30 minutes of 0.1% and 5% static  
 217 stretch in Ad-shSCR and Ad-shSWELL1 transduced HUVECs. GAPDH is used as a loading control. (**B**-  
 218 **D**) Densitometry quantification from **A** of pAKT1 (**B**), pAKT2 (**C**) and pErk1/2 (**D**). (**E**) Western blot of  
 219 peNOS, SWELL1, in response to 5% static stretching for 5, 60 and 180 min in Ad-shSCR and Ad-  
 220 shSWELL1 transduced HUVECs. (**F**) Densitometry quantification from **E** of eNOS. GAPDH is used as a  
 221 loading control. Significance between the indicated groups in all blots were calculated using a two-tailed  
 222 Student's t-test. P-values are illustrated on figures. Error bars represent mean  $\pm$  s.e.m.  
 223

224 To examine the functional consequences of endothelial SWELL1 ablation *in vivo* we generated

225 endothelial-targeted SWELL1 KO mice (eSWELL1 KO) by crossing SWELL1 floxed mice (19,

226 27) with the endothelium-restricted CDH5-Cre mouse (*CDH5-Cre;SWELL1<sup>fl/fl</sup>*; **Figure 5A**).

227 Patch-clamp recordings of primary endothelial cells isolated from WT and eSWELL1 KO mice  
228 (**Figure 5B**) revealed robust hypotonically-activated currents (Hypo, 210 mOsm) in WT  
229 endothelial cells, that are DCPIB inhibited (**Figure 5C&E**), while eSWELL1 KO endothelial cells  
230 exhibit markedly reduced hypotonically-activated currents (**Figure 5D&E**). Immunofluorescence  
231 staining of aortic ring explants revealed that SWELL1 ablation from CD31+ primary endothelial  
232 cells significantly enhanced *ex-vivo* sprouting angiogenesis from these explants (**Figure 5F&G**),  
233 based on both tube length and number of tip cells in eSWELL1 KO mice as compared to WT  
234 mice (**Figure 5H-I**), suggesting that SWELL1 regulates angiogenesis. Indeed, genome-wide  
235 transcriptome analysis of SWELL1 KD HUVEC compared to control (RNA sequencing) reveal  
236 multiple pathways enriched regulating angiogenesis, migration and tumorigenesis, including  
237 GADD45, IL-8, p70S6K (mTOR), TREM1, angiopoietin and HGF signaling (**Figure 6**,  
238 **Supplementary Table 1&2**). Also, notable are statistically significant increases in VEGFA (1.6-  
239 fold) and CD31 (2.0-fold) expression in SWELL1 KD HUVECs, both of which are pro-angiogenic  
240 and associated with mTORC1 hyperactivation(47). Pathways linked to cell adhesion and renin-  
241 angiotensin signaling are also enriched - both pathways and processes that are known to be  
242 altered in vasculature in the setting of atherosclerosis and Type 2 diabetes (T2D). Finally, the  
243 trends toward reduced eNOS protein expression observed upon SWELL1 KD in HUVECs  
244 (**Figure 2A, Supplementary Fig 1A, Fig. 3C, Figure 3-Figure Supplement 1**) are associated  
245 with reduced eNOS mRNA expression (0.54-fold in SWELL1 KD HUVEC,  $p < 10^{-4}$ ).  
246

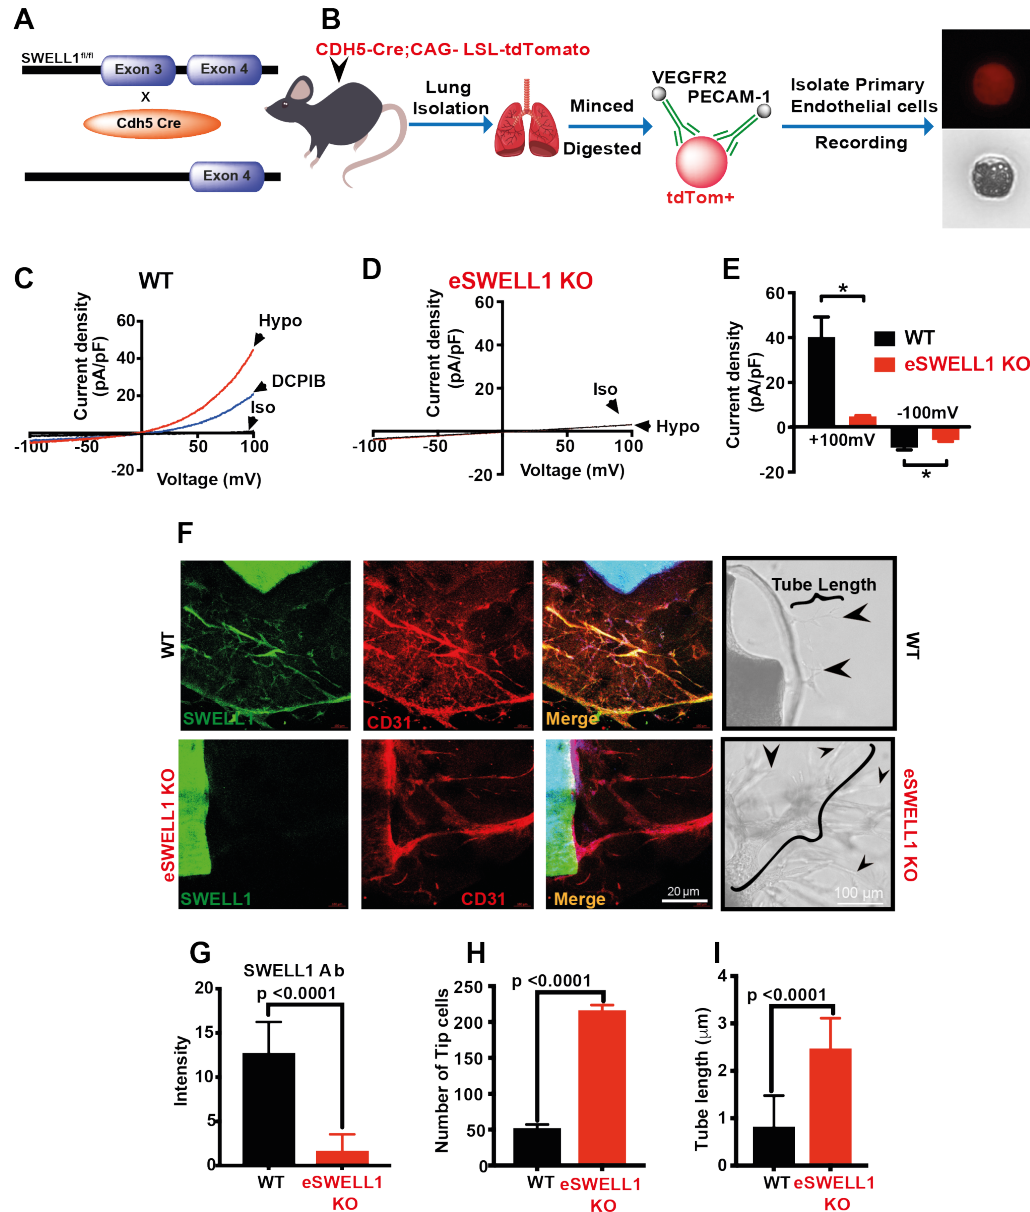

247

248 **Figure 5. Endothelium-specific SWELL1 KO mice exhibit enhanced tube formation from aortic**  
 249 **explants**

250 **A**, Strategy for endothelium targeted SWELL1 ablation to generate eSWELL1 KO. **(B)** Isolation of murine  
 251 primary endothelial cells from WT and eSWELL1 KO using tdTomato reporter mice. **C-D**, Current-voltage  
 252 relationships of VRAC in isotonic (Iso, 300 mOsm) and hypotonic (Hypo, 210 mOsm) solution in response  
 253 to voltage ramps from -100 to +100 mV over 500 ms in WT (**C**) and KO (**D**) primary murine endothelial  
 254 cells. DCPIB (10  $\mu$ M) inhibition in C (WT). **(E)** Mean outward (+100mV) and inward (-100 mV) currents  
 255 from WT (n=3 cells) and eSWELL1 KO (n = 3 cells). **(F)** Ex-vivo aorta sprouting assay performed in aortic  
 256 rings isolated from WT and eSWELL1 KO mice and cultured in FGM media for 3 days at 37°C.  
 257 Immunofluorescence staining with antibodies to SWELL1 (green), CD31 (red), SWELL1+CD31+ (Merge)  
 258 and bright field images show endothelial cell tubes sprouting from WT and eSWELL1 KO aortic rings  
 259 (black arrow heads). **(G-I)** Quantification of SWELL1 immunofluorescence signal (**G**, WT = 15, KO = 15),  
 260 number of tip cells (**H**, WT = 26, KO = 31), and endothelial tube length (**I**, WT = 30, KO = 30) in WT and  
 261 eSWELL1 KO aortic explants. Statistical significance between the indicated values calculated using a



262 two-tailed Student's t-test. P-values are illustrated on figures. Error bars represent mean  $\pm$  s.e.m. n = 3,  
 263 independent experiments.

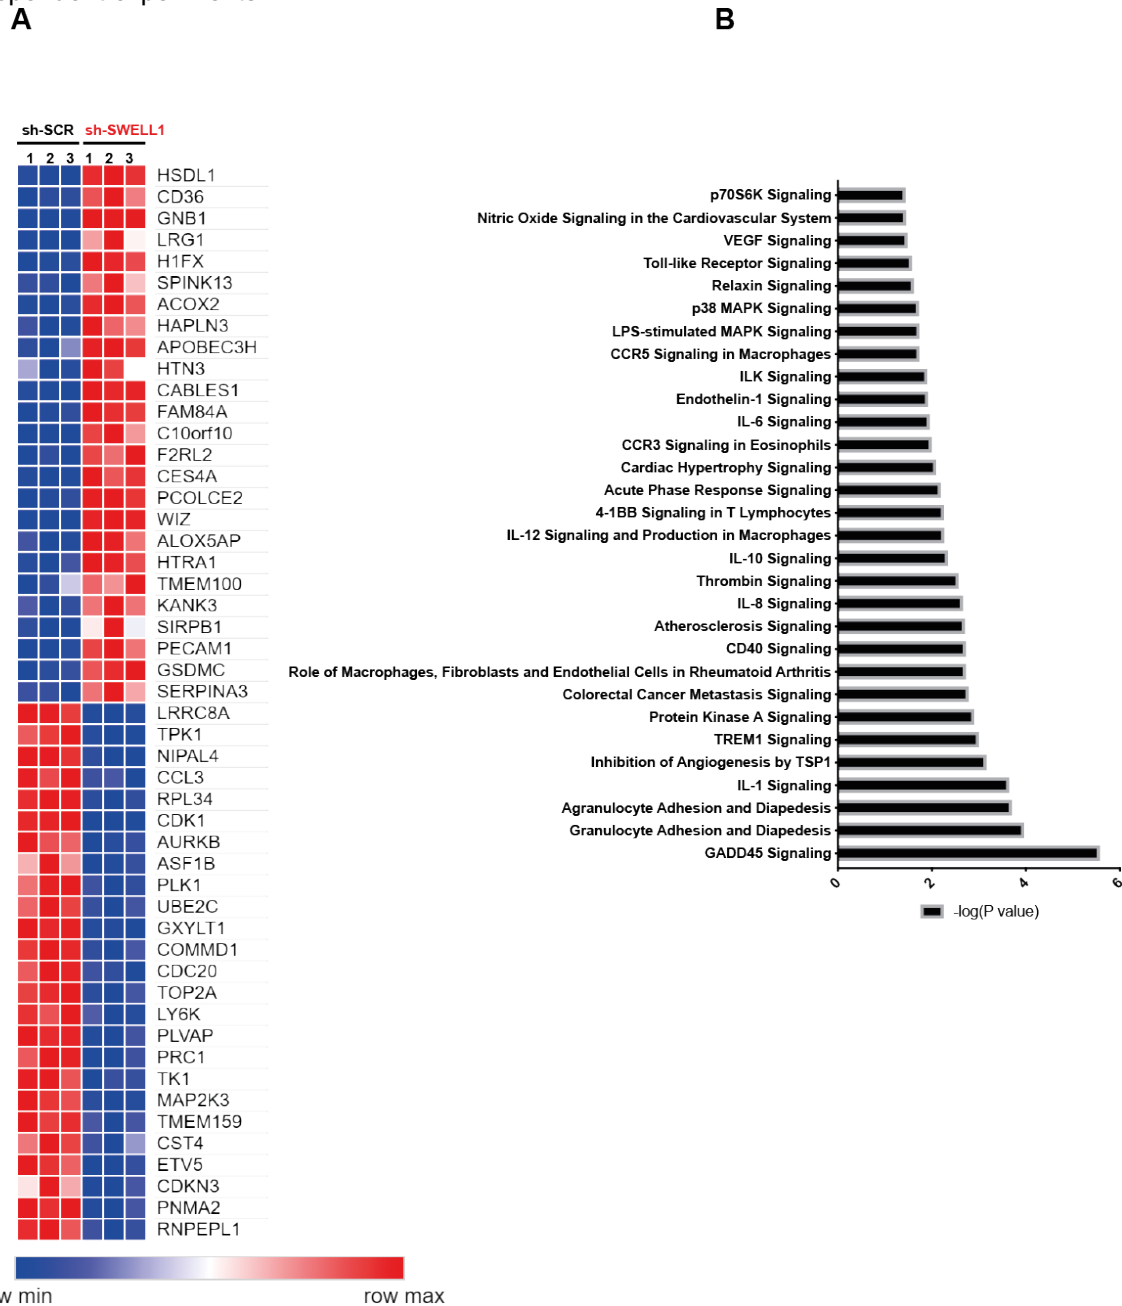

264

265 **Figure 6. RNA sequencing of Ad-shSCR and Ad-shSWELL1 transduced HUVECs.**

266 **A**, Heatmap analysis displaying top 25 upregulated or 25 downregulated genes between shSCR and  
 267 shSWELL1. **(B)** IPA canonical pathway analysis of genes significantly regulated by shSWELL1 in  
 268 comparison to shSCR. n = 3 for each group. For analysis with IPA, FPKM cutoffs of 1.5, fold change of  
 269  $\geq 1.5$ , and false discovery rate  $< 0.05$  were utilized for significantly differentially regulated genes.  
 270

271

272 **eSWELL1 KO mice exhibit mild angiotensin-II stimulated hypertension and impaired**  
273 **retinal blood flow in the setting of Type 2 diabetes**

274 Based on our findings that SWELL1 regulates AKT-eNOS signaling in endothelium, and that  
275 eNOS signaling is central to blood pressure regulation, we next examined blood pressures in  
276 eSWELL1 KO mice compared to WT controls (SWELL1<sup>fl/fl</sup> mice). Male mice exhibit no  
277 significant differences in systolic blood pressure under basal conditions (**Figure 7A**), while  
278 female mice are mildly hypertensive relative to WT mice (**Figure 7B**). However, after 4 weeks of  
279 angiotensin-II infusion (Ang II), male eSWELL1 KO mice develop exacerbated systolic  
280 hypertension as compared to AngII-treated WT mice (**Figure 7C**). These data are consistent  
281 with endothelial dysfunction and impaired vascular relaxation in eSWELL1 KO mice, resulting in  
282 a propensity for systolic hypertension.

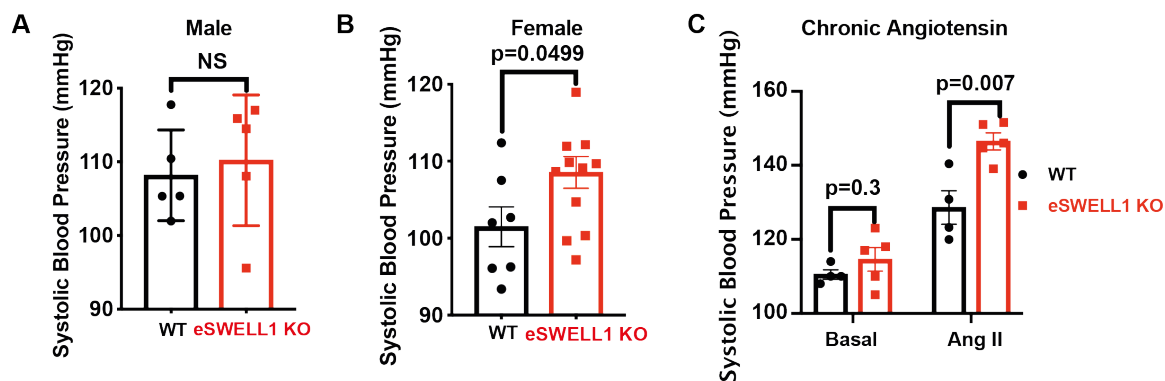

283

284 **Figure 7. Endothelial-targeted SWELL1 deletion predisposes to systolic hypertension**

285 Tail-cuff systolic blood pressures of (A) male and (B) female WT (n = 5 males and 7 females) and  
286 eSWELL1 KO (n = 5 males and 12 females) mice. (C) Systolic blood pressures of male WT (n = 4) and  
287 eSWELL1 KO (n = 5) mice under basal conditions and after 4 weeks of chronic angiotensin II infusion.  
288 Statistical significance between the indicated values calculated using a two-tailed Student's t-test. P-  
289 values are illustrated on figures. Data are shown as mean  $\pm$  s.e.m.

290

291 As endothelial dysfunction may also result in impaired blood flow we performed retinal imaging  
292 during i.p. injection of fluorescein to assess retinal vessel blood flow and morphology in WT and  
293 eSWELL1 KO mice. Mice raised on a regular diet have mild, non-significant impairments in  
294 retinal blood flow, based on the relative rate of rise of the fluorescein signal in retinal vessels

295 (Figure 8-Figure Supplement 1). There is also evidence of mild focal narrowing of retinal  
296 vessels in eSWELL1 KO as compared to WT mice (Figure 8-Figure Supplement 1A, D&E),  
297 with no significant differences in other parameters (Figure 8-Figure Supplement 1G-L). In  
298 mice raised on high-fat high-sucrose (HFHS) diet, retinal blood flow is more severely impaired  
299 (Figure 8A-C) with significant focal, and diffuse retinal vessel narrowing in eSWELL1 KO mice  
300 compared to WT mice (Figure 8A; F-H, Figure 8-Figure Supplement 2, Figure 8-Video 1),  
301 and this relative difference is markedly worse in female compared to male mice. These findings  
302 are all consistent with endothelial dysfunction and impaired retinal vessel vasorelaxation due to  
303 reduced eNOS expression and activity, particularly in the setting of HFHS diet. Also consistent  
304 with impaired eNOS activity are reductions in vessel number (Figure 8E), vessel surface area  
305 (Figure 8H), number of end points (Figure 8K), branching index (Figure 8L), and increased  
306 lacunarity (Figure 8J). These parameters are all suggestive of diabetes-induced retinal vessel  
307 dysfunction in the eSWELL1 KO mice, consistent with the loss of eNOS activity that is expected  
308 when insulin signaling is compromised(48) (49). Notably, both WT and eSWELL1 KO mice were  
309 found to be equally glucose intolerant and insulin-resistant (Figure 8-Figure Supplement 3),  
310 indicating that these differences in microvascular dysfunction were not due increased  
311 hyperglycemia and more severe diabetes in eSWELL1 KO mice. Taken together, our findings  
312 reveal that SWELL1 is highly expressed in endothelium and functionally encodes endothelial  
313 VRAC. SWELL1 regulates ERK, AKT-eNOS, and mTOR signaling, forms a SWELL1-GRB2-  
314 Cav1-eNOS signaling complex, and regulates vascular function *in vivo*.  
315

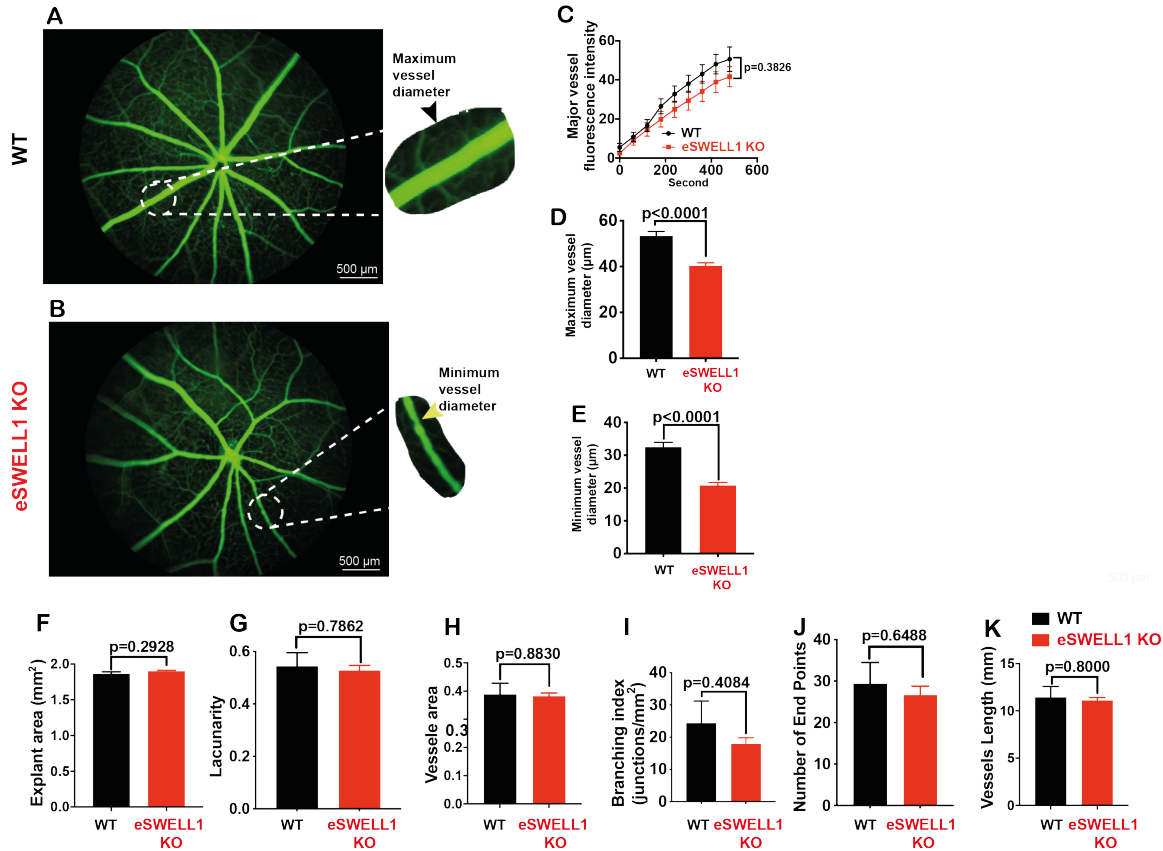

316

317 **Figure 8- Figure Supplement-1. Endothelium-specific SWELL1 KO mice exhibit mild retinal**  
 318 **microvascular disease at baseline**

319 Representative fluorescein retinal angiograms of 13 week old WT (A) and eSWELL1 KO (B) mice raised  
 320 on a regular diet. Inset shows magnified view of retinal vessels. (C-E) Quantification of major vessel  
 321 fluorescence intensity over time after i.p. fluorescein injection (C), maximum vessel diameter (D), and  
 322 minimum vessel diameter (E) in WT (n = 11 mice) and eSWELL1 KO (n = 11 mice). (F-K) Quantification  
 323 of explant area (F), Lacunarity (G), Vessel area (H), Branching Index (I), Number of end points (J); and  
 324 vessel length (K) in WT and eSWELL1 KO mice. Statistical significance between the indicated values  
 325 calculated using a two-tailed Student's t-test. P-values are illustrated on figures. Error bars represent  
 326 mean  $\pm$  s.e.m. Scale bar is 500  $\mu\text{m}$ .  
 327

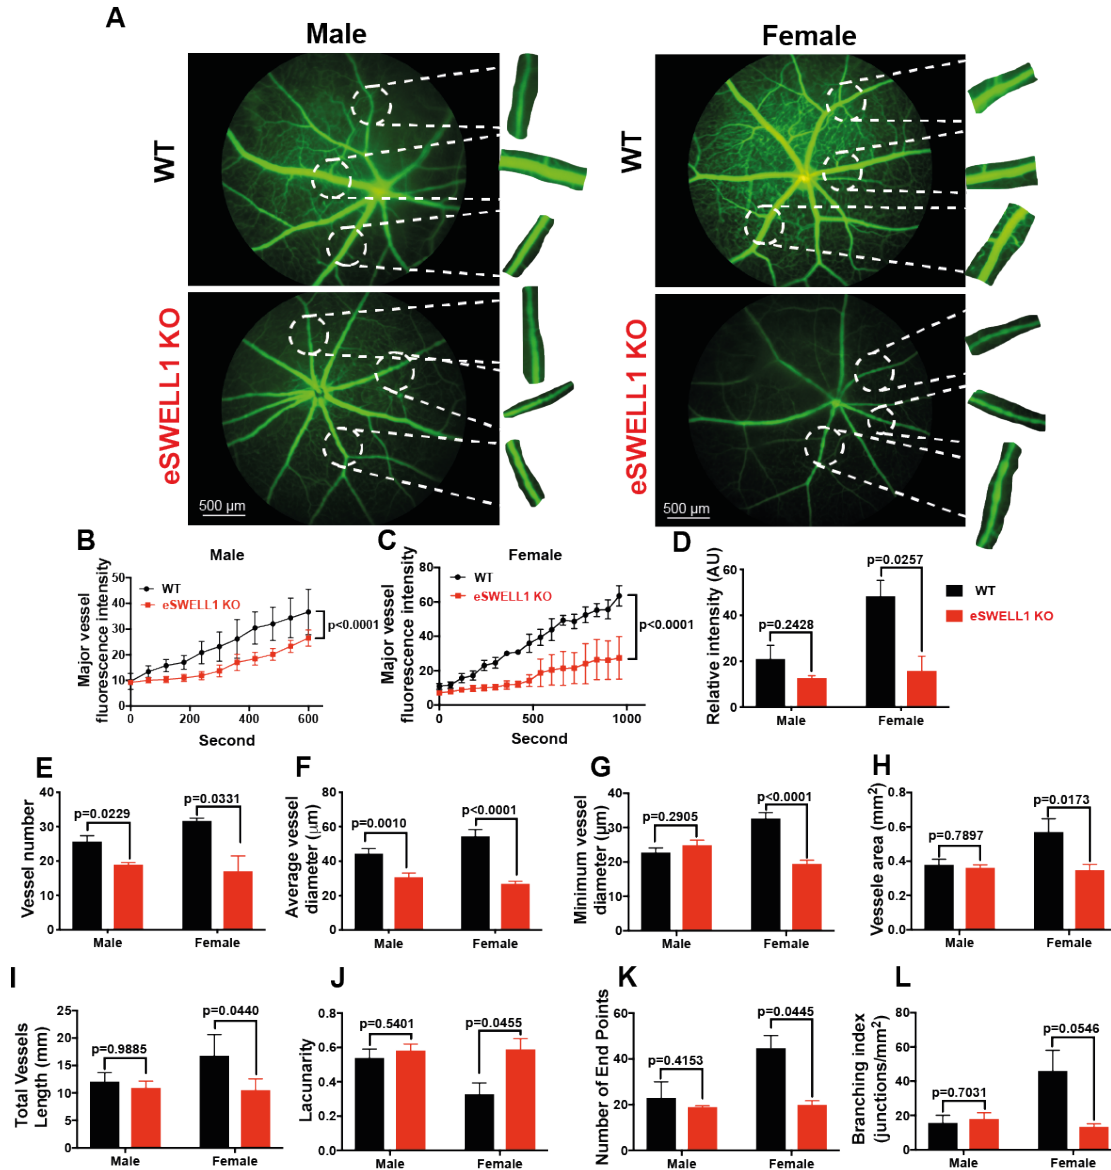

328  
329 **Figure 8. Endothelium-specific SWELL1 KO mice exhibit exacerbated impairments retinal**  
330 **microvascular disease in the setting of Type 2 diabetes**

331 **A**, Representative fluorescein retinal angiograms of WT (top) and eSWELL1 KO (bottom) male (left) and  
332 female (right) mice raised on a high-fat high sucrose (HFHS) diet. Inset shows magnified view of retinal  
333 vessels. Quantification of major vessel fluorescence intensity over time after i.p. fluorescein injection in  
334 (B) male (n = 3) and (C) female (n = 3) WT and eSWELL1 KO mice. (D-K) Quantification of total retinal  
335 vessel intensity (D), Total vessel number (E); Vessel diameter (F); Minimum vessel diameter (G); Vessel  
336 area (H); Total vessel length (I); Lacunarity (J); Number of end points (K); and Branching index (L)  
337 of retinal vessels in WT and eSWELL1 KO mice. Statistical significance between the indicated values  
338 calculated using 2-way Anova for B&C and D-L using a two-tailed Student's t-test. P-values are illustrated  
339 on figures. Error bars represent mean ± s.e.m.

340

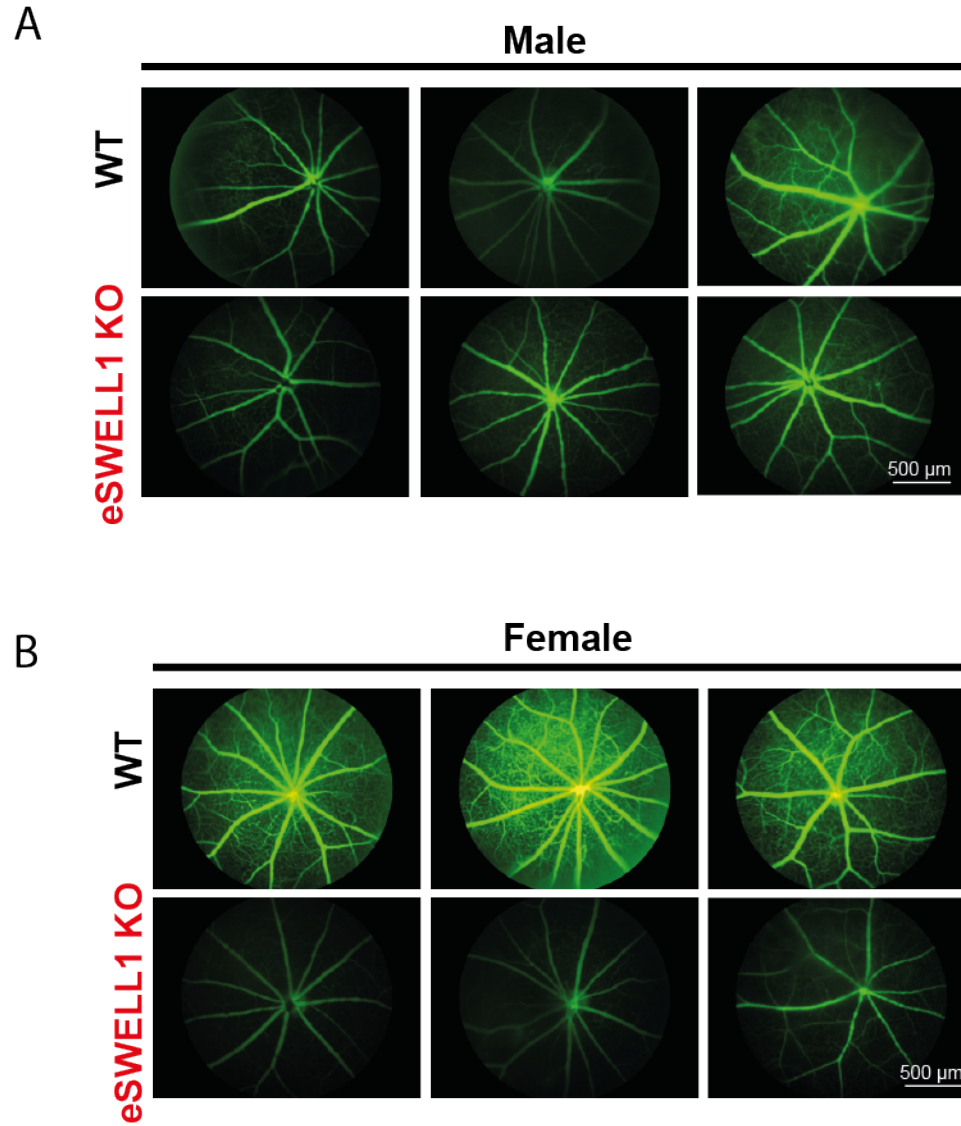

341

342 **Figure 8- Figure Supplement-2. Endothelium-specific SWELL1 KO mice exhibit exacerbated**  
343 **impairments retinal microvascular disease in the setting of Type 2 diabetes**

344 Three representative fluorescein retinal angiograms of WT and eSWELL1 KO from male (**A**) and female  
345 (**B**) mice raised on a high-fat high sucrose (HFHS) diet for 10 months. Scale bar is 500  $\mu$ m.

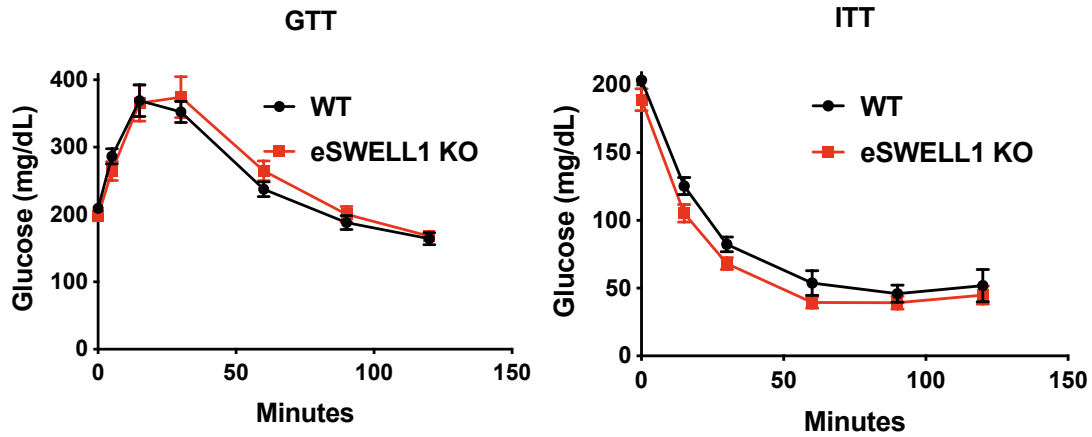

346

347 **Figure 8- Figure Supplement-3. Glucose tolerance (GTT) and insulin tolerance (ITT) are not altered**  
348 **in endothelium-specific SWELL1 KO mice (n = 13) compared to WT mice (n = 8) raised on a high-**  
349 **fat high sucrose diet for 10 months.**

350

351

## 352 **Discussion**

353 Our findings demonstrate that the SWELL1-LRRC8 heterohexamer functionally encodes  
354 endothelial VRAC, whereby SWELL1-LRRC8 associates with GRB2 and Cav1 and positively  
355 regulates PI3K-AKT-eNOS and ERK1/2 signaling. Under basal conditions and with stretch,  
356 SWELL1 depletion in HUVECs reduces pAKT2, pAKT1, p-eNOS and pERK1/2. These data  
357 reveal that SWELL1 mediated PI3K-AKT signaling is conserved in endothelium, similar to  
358 previous observations in adipocytes(19), and in turn positively regulates eNOS expression and  
359 activity. Consistent with this mechanism, endothelial-targeted SWELL1 ablation *in vivo*  
360 predisposes to microvascular dysfunction in the setting of Type 2 diabetes, and to hypertension  
361 in response to angiotensin-II infusion. These results are in line with the notion that SWELL1  
362 depleted endothelium contributes to an insulin-resistant state in which impaired PI3K-AKT-  
363 eNOS signaling results in a propensity for vascular dysfunction(24, 25). Insulin-mediated  
364 regulation of NO is physiologically(50-52) and pathophysiologically(53) important, as NO has  
365 vasodilatory(54, 55), anti-inflammatory(56), antioxidant(57), and antiplatelet effects(58-61).  
366 Indeed, impaired NO-mediated vascular reactivity is a predictor of future adverse cardiac  
367 events(62) and portends increased risk of atherosclerosis(63). Consistent with these NO-  
368 mediated effects, the RNA sequencing data derived from SWELL1 KD HUVECs revealed  
369 enrichment in inflammatory, cell adhesion, and proliferation pathways (GADD45, IL-8, mTOR,  
370 TREM1 signaling) that may arise from SWELL1-mediated dysregulation of eNOS activity.  
371  
372 In addition to reductions in AKT-eNOS signaling, SWELL1 depletion in HUVECs also reduced  
373 ERK1/2 signaling. This decrease in pERK1/2 suggests impaired MAPK signaling which is  
374 connected to the insulin receptor by GRB2-SOS. Indeed, we also found that SWELL1 and  
375 GRB2 interact in HUVECs, and this may provide the molecular mechanism for the observed  
376 defect in ERK signaling. Interestingly, GRB2-MAPK signaling is thought to promote  
377 angiogenesis, migration and proliferation(64), so reductions in ERK1/2 signaling would be



378 predicted to inhibit these processes. Instead, aortic explants from SWELL1 KO mice exhibit  
379 augmented tube formation - indicative of pro-angiogenesis. This pro-angiogenesis, pro-  
380 migration cellular phenotype observed upon SWELL1 depletion might be explained by increases  
381 pS6K and p70 signaling, as observed in HUVECs, and suggestive of mTORC1  
382 hyperactivation(47), in addition to the observed increases in VEGFA and CD31 expression.  
383 Future studies will further delineate the molecular mechanisms of SWELL1 modulation of  
384 insulin-GRB2-AKT/ERK1/2 and mTOR signaling in endothelial cells.

385

386 The phenotype of endothelial targeted SWELL1 KO (eSWELL1 KO) mice are consistent with a  
387 reduction in eNOS and p-eNOS as these mice exhibit mild hypertension at baseline (females)  
388 and exacerbated hypertension in response to chronic angiotension infusion, suggesting a  
389 modulatory effect on vascular reactivity. Similarly, retinal blood flow is only mildly impaired in  
390 eSWELL1 KO mice raised on a regular diet, with some evidence of microvascular disease.  
391 However, both retinal blood flow and retinal vessel morphology are markedly impaired in obese-  
392 T2D, insulin resistant eSWELL1 KO mice raised on a high fat high sucrose diet compared to  
393 controls. This is consistent with a synergistic role of endothelial SWELL1 ablation and  
394 T2D/obesity in the pathogenesis of vascular disease. Indeed, our results suggest that  
395 reductions in SWELL1 signaling may contribute to impaired vascular function observed in  
396 humans in response to insulin and/or shear stress in the setting of obesity (65-68) and insulin-  
397 resistance (69).

398

399

#### 400 **AUTHOR CONTRIBUTIONS**

401 Conceptualization, R.S.; Methodology, A.A., C.T., O.A., A.K., U.F., J.M., M. E-H., M.R., C.E.G.,  
402 R.A.M., L.X., S.G., R.F.M., C.K., A.S., J.A., R.S.; Formal Analysis, A.A., R.S., C.T., J.M., A.K.,  
403 L.X., S.G, R.A.M., U.F., C.K., C.E.G.; Investigation, R.S., A.A., L.X., J.M., A.K., S.G, C.T., C.K.,

404 C.G., R.M.; Resources, R.S.; Writing – Original Draft, R.S., Writing – Review & Editing, R.S.,  
405 C.T., A.A., L.X., S.G., C.E.G.; Visualization, R.S., A.A., C.T., J.M., C.K., L.X., S.G, R.A.M.,  
406 C.E.G.; Supervision, A.S., R.F.M., C.E.G, R.S.; Funding Acquisition, R.S.

407

#### 408 **DATA AVAILABILITY**

409 All raw RNA sequencing data will be uploaded to Gene Expression Omnibus (GEO). All other  
410 data will be made available upon reasonable request.

411

#### 412 **ACKNOWLEDGMENTS**

413 RNA-Seq data presented herein were obtained at the Genomics Division of the Iowa Institute of  
414 Human Genetics. This work was supported by grants from the NIH/NHLBI R01 HL125436  
415 (C.E.G), NIH/NHLBI 5R00HL125683 (A.S), Cancer Research Foundation Young Investigator  
416 Award (A.S.), NIH NIDDK 1R01DK106009 (R.S.), the Roy J. Carver Trust (R.S.), UIHC Center  
417 for Hypertension Research Pilot and Feasibility Grant and from King Abdullah International  
418 Medical Research Center (KAIMRC) grant RA17-014-A (A. A.). We thank Dr. Rithwick  
419 Rajagopal for insightful reading of the manuscript.

420

421

422

## References

- 423 1. Cahill PA, and Redmond EM. Vascular endothelium - Gatekeeper of vessel health.  
424 *Atherosclerosis*. 2016;248:97-109.
- 425 2. Gerhold KA, and Schwartz MA. Ion Channels in Endothelial Responses to Fluid Shear  
426 Stress. *Physiology (Bethesda)*. 2016;31(5):359-69.
- 427 3. Sonkusare SK, Bonev AD, Ledoux J, Liedtke W, Kotlikoff MI, Heppner TJ, et al.  
428 Elementary Ca<sup>2+</sup> signals through endothelial TRPV4 channels regulate vascular  
429 function. *Science*. 2012;336(6081):597-601.
- 430 4. Earley S, Pauyo T, Drapp R, Tavares MJ, Liedtke W, and Brayden JE. TRPV4-  
431 dependent dilation of peripheral resistance arteries influences arterial pressure. *Am J*  
432 *Physiol Heart Circ Physiol*. 2009;297(3):H1096-102.
- 433 5. Zhang DX, Mendoza SA, Bubolz AH, Mizuno A, Ge ZD, Li R, et al. Transient receptor  
434 potential vanilloid type 4-deficient mice exhibit impaired endothelium-dependent  
435 relaxation induced by acetylcholine in vitro and in vivo. *Hypertension*. 2009;53(3):532-8.
- 436 6. Mendoza SA, Fang J, Gutterman DD, Wilcox DA, Bubolz AH, Li R, et al. TRPV4-  
437 mediated endothelial Ca<sup>2+</sup> influx and vasodilation in response to shear stress. *Am J*  
438 *Physiol Heart Circ Physiol*. 2010;298(2):H466-76.
- 439 7. Rode B, Shi J, Endesh N, Drinkhill MJ, Webster PJ, Lotteau SJ, et al. Piezo1 channels  
440 sense whole body physical activity to reset cardiovascular homeostasis and enhance  
441 performance. *Nat Commun*. 2017;8(1):350.
- 442 8. Li J, Hou B, Tumova S, Muraki K, Bruns A, Ludlow MJ, et al. Piezo1 integration of  
443 vascular architecture with physiological force. *Nature*. 2014;515(7526):279-82.
- 444 9. Coste B, Mathur J, Schmidt M, Earley TJ, Ranade S, Petrus MJ, et al. Piezo1 and  
445 Piezo2 are essential components of distinct mechanically activated cation channels.  
446 *Science*. 2010;330(6000):55-60.
- 447 10. Nilius B, and Droogmans G. Ion channels and their functional role in vascular  
448 endothelium. *Physiol Rev*. 2001;81(4):1415-59.
- 449 11. Barakat AI, Leaver EV, Pappone PA, and Davies PF. A flow-activated chloride-selective  
450 membrane current in vascular endothelial cells. *Circ Res*. 1999;85(9):820-8.
- 451 12. Sawada A, Takihara Y, Kim JY, Matsuda-Hashii Y, Tokimasa S, Fujisaki H, et al. A  
452 congenital mutation of the novel gene LRRC8 causes agammaglobulinemia in humans.  
453 *J Clin Invest*. 2003;112(11):1707-13.
- 454 13. Kubota K, Kim JY, Sawada A, Tokimasa S, Fujisaki H, Matsuda-Hashii Y, et al. LRRC8  
455 involved in B cell development belongs to a novel family of leucine-rich repeat proteins.  
456 *FEBS Lett*. 2004;564(1-2):147-52.
- 457 14. Kumar L, Chou J, Yee CS, Borzutzky A, Vollmann EH, von Andrian UH, et al. Leucine-  
458 rich repeat containing 8A (LRRC8A) is essential for T lymphocyte development and  
459 function. *J Exp Med*. 2014;211(5):929-42.
- 460 15. Abascal F, and Zardoya R. LRRC8 proteins share a common ancestor with pannexins,  
461 and may form hexameric channels involved in cell-cell communication. *Bioessays*.  
462 2012;34(7):551-60.
- 463 16. Qiu Z, Dubin AE, Mathur J, Tu B, Reddy K, Miraglia LJ, et al. SWELL1, a Plasma  
464 Membrane Protein, Is an Essential Component of Volume-Regulated Anion Channel.  
465 *Cell*. 2014;157(2):447-58.
- 466 17. Voss FK, Ullrich F, Munch J, Lazarow K, Lutter D, Mah N, et al. Identification of LRRC8  
467 heteromers as an essential component of the volume-regulated anion channel VRAC.  
468 *Science*. 2014;344(6184):634-8.
- 469 18. Syeda R, Qiu Z, Dubin AE, Murthy SE, Florendo MN, Mason DE, et al. LRRC8 Proteins  
470 Form Volume-Regulated Anion Channels that Sense Ionic Strength. *Cell*.  
471 2016;164(3):499-511.

- 472 19. Zhang Y, Xie L, Gunasekar SK, Tong D, Mishra A, Gibson WJ, et al. SWELL1 is a  
473 regulator of adipocyte size, insulin signalling and glucose homeostasis. *Nature cell*  
474 *biology*. 2017;19(5):504-17.
- 475 20. Xie L, Zhang Y, Gunasekar S, Mishra A, Cao L, and Sah R. Induction of adipose and  
476 hepatic SWELL1 expression is required for maintaining systemic insulin-sensitivity in  
477 obesity. *Channels*. 2017:0.
- 478 21. Gunasekar SK, Xie L, and Sah R. SWELL signalling in adipocytes: can fat 'feel' fat?  
479 *Adipocyte*. 2019;8(1):223-8.
- 480 22. Hu Z, Xiong Y, Han X, Geng C, Jiang B, Huo Y, et al. Acute mechanical stretch  
481 promotes eNOS activation in venous endothelial cells mainly via PKA and Akt pathways.  
482 *PLoS One*. 2013;8(8):e71359.
- 483 23. Janus A, Szahidewicz-Krupska E, Mazur G, and Doroszko A. Insulin Resistance and  
484 Endothelial Dysfunction Constitute a Common Therapeutic Target in Cardiometabolic  
485 Disorders. *Mediators Inflamm*. 2016;2016:3634948.
- 486 24. Kearney MT, Duncan ER, Kahn M, and Wheatcroft SB. Insulin resistance and  
487 endothelial cell dysfunction: studies in mammalian models. *Exp Physiol*. 2008;93(1):158-  
488 63.
- 489 25. Muniyappa R, and Sowers JR. Role of insulin resistance in endothelial dysfunction. *Rev*  
490 *Endocr Metab Disord*. 2013;14(1):5-12.
- 491 26. Barakat AI. Responsiveness of vascular endothelium to shear stress: potential role of ion  
492 channels and cellular cytoskeleton (review). *Int J Mol Med*. 1999;4(4):323-32.
- 493 27. Kang C, Xie L, Gunasekar SK, Mishra A, Zhang Y, Pai S, et al. SWELL1 is a glucose  
494 sensor regulating beta-cell excitability and systemic glycaemia. *Nat Commun*.  
495 2018;9(1):367.
- 496 28. Stuhlmann T, Planells-Cases R, and Jentsch TJ. LRRC8/VRAC anion channels enhance  
497 beta-cell glucose sensing and insulin secretion. *Nat Commun*. 2018;9(1):1974.
- 498 29. Wang R, Lu Y, Gunasekar S, Zhang Y, Benson CJ, Chapleau MW, et al. The volume-  
499 regulated anion channel (LRRC8) in nodose neurons is sensitive to acidic pH. *JCI*  
500 *Insight*. 2017;2(5):e90632.
- 501 30. Luck JC, Puchkov D, Ullrich F, and Jentsch TJ. LRRC8/VRAC anion channels are  
502 required for late stages of spermatid development in mice. *J Biol Chem*.  
503 2018;293(30):11796-808.
- 504 31. Duncan ER, Crossey PA, Walker S, Anilkumar N, Poston L, Douglas G, et al. Effect of  
505 endothelium-specific insulin resistance on endothelial function in vivo. *Diabetes*.  
506 2008;57(12):3307-14.
- 507 32. Morello F, Perino A, and Hirsch E. Phosphoinositide 3-kinase signalling in the vascular  
508 system. *Cardiovasc Res*. 2009;82(2):261-71.
- 509 33. Ju H, Zou R, Venema VJ, and Venema RC. Direct interaction of endothelial nitric-oxide  
510 synthase and caveolin-1 inhibits synthase activity. *J Biol Chem*. 1997;272(30):18522-5.
- 511 34. Venema VJ, Zou R, Ju H, Marrero MB, and Venema RC. Caveolin-1 detergent solubility  
512 and association with endothelial nitric oxide synthase is modulated by tyrosine  
513 phosphorylation. *Biochemical and biophysical research communications*.  
514 1997;236(1):155-61.
- 515 35. Goligorsky MS, Li H, Brodsky S, and Chen J. Relationships between caveolae and  
516 eNOS: everything in proximity and the proximity of everything. *Am J Physiol Renal*  
517 *Physiol*. 2002;283(1):F1-10.
- 518 36. Salameh A, Galvagni F, Bardelli M, Bussolino F, and Oliviero S. Direct recruitment of  
519 CRK and GRB2 to VEGFR-3 induces proliferation, migration, and survival of endothelial  
520 cells through the activation of ERK, AKT, and JNK pathways. *Blood*. 2005;106(10):3423-  
521 31.

- 522 37. Nassoy P, and Lamaze C. Stressing caveolae new role in cell mechanics. *Trends in cell*  
523 *biology*. 2012;22(7):381-9.
- 524 38. Sinha B, Koster D, Ruez R, Gonnord P, Bastiani M, Abankwa D, et al. Cells respond to  
525 mechanical stress by rapid disassembly of caveolae. *Cell*. 2011;144(3):402-13.
- 526 39. Sedding DG, Hermesen J, Seay U, Eickelberg O, Kummer W, Schwencke C, et al.  
527 Caveolin-1 facilitates mechanosensitive protein kinase B (Akt) signaling in vitro and in  
528 vivo. *Circ Res*. 2005;96(6):635-42.
- 529 40. Trouet D, Hermans D, Droogmans G, Nilius B, and Eggermont J. Inhibition of volume-  
530 regulated anion channels by dominant-negative caveolin-1. *Biochemical and biophysical*  
531 *research communications*. 2001;284(2):461-5.
- 532 41. Trouet D, Nilius B, Jacobs A, Remacle C, Droogmans G, and Eggermont J. Caveolin-1  
533 modulates the activity of the volume-regulated chloride channel. *J Physiol*. 1999;520 Pt  
534 1:113-9.
- 535 42. Browe DM, and Baumgarten CM. Stretch of beta 1 integrin activates an outwardly  
536 rectifying chloride current via FAK and Src in rabbit ventricular myocytes. *J Gen Physiol*.  
537 2003;122(6):689-702.
- 538 43. Browe DM, and Baumgarten CM. EGFR kinase regulates volume-sensitive chloride  
539 current elicited by integrin stretch via PI-3K and NADPH oxidase in ventricular myocytes.  
540 *J Gen Physiol*. 2006;127(3):237-51.
- 541 44. Nakao M, Ono K, Fujisawa S, and Iijima T. Mechanical stress-induced Ca<sup>2+</sup> entry and  
542 Cl<sup>-</sup> current in cultured human aortic endothelial cells. *Am J Physiol*. 1999;276(1 Pt  
543 1):C238-49.
- 544 45. Romanenko VG, Davies PF, and Levitan I. Dual effect of fluid shear stress on volume-  
545 regulated anion current in bovine aortic endothelial cells. *Am J Physiol Cell Physiol*.  
546 2002;282(4):C708-18.
- 547 46. Fulton D, Fontana J, Sowa G, Gratton JP, Lin M, Li KX, et al. Localization of endothelial  
548 nitric-oxide synthase phosphorylated on serine 1179 and nitric oxide in Golgi and plasma  
549 membrane defines the existence of two pools of active enzyme. *J Biol Chem*.  
550 2002;277(6):4277-84.
- 551 47. Ding Y, Shan L, Nai W, Lin X, Zhou L, Dong X, et al. DEPTOR Deficiency-Mediated  
552 mTORc1 Hyperactivation in Vascular Endothelial Cells Promotes Angiogenesis. *Cell*  
553 *Physiol Biochem*. 2018;46(2):520-31.
- 554 48. Brooks SE, Gu X, Samuel S, Marcus DM, Bartoli M, Huang PL, et al. Reduced severity  
555 of oxygen-induced retinopathy in eNOS-deficient mice. *Invest Ophthalmol Vis Sci*.  
556 2001;42(1):222-8.
- 557 49. Kondo T, Vicent D, Suzuma K, Yanagisawa M, King GL, Holzenberger M, et al.  
558 Knockout of insulin and IGF-1 receptors on vascular endothelial cells protects against  
559 retinal neovascularization. *J Clin Invest*. 2003;111(12):1835-42.
- 560 50. Zeng G, and Quon MJ. Insulin-stimulated production of nitric oxide is inhibited by  
561 wortmannin. Direct measurement in vascular endothelial cells. *J Clin Invest*.  
562 1996;98(4):894-8.
- 563 51. Zeng G, Nystrom FH, Ravichandran LV, Cong LN, Kirby M, Mostowski H, et al. Roles for  
564 insulin receptor, PI3-kinase, and Akt in insulin-signaling pathways related to production  
565 of nitric oxide in human vascular endothelial cells. *Circulation*. 2000;101(13):1539-45.
- 566 52. Montagnani M, Ravichandran LV, Chen H, Esposito DL, and Quon MJ. Insulin receptor  
567 substrate-1 and phosphoinositide-dependent kinase-1 are required for insulin-stimulated  
568 production of nitric oxide in endothelial cells. *Molecular endocrinology*. 2002;16(8):1931-  
569 42.
- 570 53. Steinberg HO, Chaker H, Leaming R, Johnson A, Brechtel G, and Baron AD.  
571 Obesity/insulin resistance is associated with endothelial dysfunction. Implications for the  
572 syndrome of insulin resistance. *J Clin Invest*. 1996;97(11):2601-10.

- 573 54. Quillon A, Fromy B, and Debret R. Endothelium microenvironment sensing leading to  
574 nitric oxide mediated vasodilation: a review of nervous and biomechanical signals. *Nitric*  
575 *Oxide*. 2015;45:20-6.
- 576 55. Palmer RM, Ferrige AG, and Moncada S. Nitric oxide release accounts for the biological  
577 activity of endothelium-derived relaxing factor. *Nature*. 1987;327(6122):524-6.
- 578 56. Kataoka C, Egashira K, Inoue S, Takemoto M, Ni W, Koyanagi M, et al. Important role of  
579 Rho-kinase in the pathogenesis of cardiovascular inflammation and remodeling induced  
580 by long-term blockade of nitric oxide synthesis in rats. *Hypertension*. 2002;39(2):245-50.
- 581 57. Clapp BR, Hingorani AD, Kharbanda RK, Mohamed-Ali V, Stephens JW, Vallance P, et  
582 al. Inflammation-induced endothelial dysfunction involves reduced nitric oxide  
583 bioavailability and increased oxidant stress. *Cardiovasc Res*. 2004;64(1):172-8.
- 584 58. Schafer A, Widder J, Eigenthaler M, Ertl G, and Bauersachs J. Reduced basal nitric  
585 oxide bioavailability and platelet activation in young spontaneously hypertensive rats.  
586 *Biochem Pharmacol*. 2004;67(12):2273-9.
- 587 59. Schafer A, Wiesmann F, Neubauer S, Eigenthaler M, Bauersachs J, and Channon KM.  
588 Rapid regulation of platelet activation in vivo by nitric oxide. *Circulation*.  
589 2004;109(15):1819-22.
- 590 60. Radomski MW, Palmer RM, and Moncada S. The role of nitric oxide and cGMP in  
591 platelet adhesion to vascular endothelium. *Biochemical and biophysical research*  
592 *communications*. 1987;148(3):1482-9.
- 593 61. Radomski MW, Palmer RM, and Moncada S. Endogenous nitric oxide inhibits human  
594 platelet adhesion to vascular endothelium. *Lancet*. 1987;2(8567):1057-8.
- 595 62. Schachinger V, Britten MB, and Zeiher AM. Prognostic impact of coronary vasodilator  
596 dysfunction on adverse long-term outcome of coronary heart disease. *Circulation*.  
597 2000;101(16):1899-906.
- 598 63. Bugiardini R, Manfredini O, Pizzi C, Fontana F, and Morgagni G. Endothelial function  
599 predicts future development of coronary artery disease: a study of women with chest  
600 pain and normal coronary angiograms. *Circulation*. 2004;109(21):2518-23.
- 601 64. Zhao J, Wang W, Ha CH, Kim JY, Wong C, Redmond EM, et al. Endothelial Grb2-  
602 associated binder 1 is crucial for postnatal angiogenesis. *Arterioscler Thromb Vasc Biol*.  
603 2011;31(5):1016-23.
- 604 65. Arcaro G, Zamboni M, Rossi L, Turcato E, Covi G, Armellini F, et al. Body fat distribution  
605 predicts the degree of endothelial dysfunction in uncomplicated obesity. *Int J Obes Relat*  
606 *Metab Disord*. 1999;23(9):936-42.
- 607 66. Tack CJ, Ong MK, Lutterman JA, and Smits P. Insulin-induced vasodilatation and  
608 endothelial function in obesity/insulin resistance. Effects of troglitazone. *Diabetologia*.  
609 1998;41(5):569-76.
- 610 67. Westerbacka J, Vehkavaara S, Bergholm R, Wilkinson I, Cockcroft J, and Yki-Jarvinen  
611 H. Marked resistance of the ability of insulin to decrease arterial stiffness characterizes  
612 human obesity. *Diabetes*. 1999;48(4):821-7.
- 613 68. Williams IL, Chowienczyk PJ, Wheatcroft SB, Patel A, Sherwood R, Momin A, et al.  
614 Effect of fat distribution on endothelial-dependent and endothelial-independent  
615 vasodilatation in healthy humans. *Diabetes Obes Metab*. 2006;8(3):296-301.
- 616 69. Murphy C, Kanaganayagam GS, Jiang B, Chowienczyk PJ, Zbinden R, Saha M, et al.  
617 Vascular dysfunction and reduced circulating endothelial progenitor cells in young  
618 healthy UK South Asian men. *Arterioscler Thromb Vasc Biol*. 2007;27(4):936-42.
- 619
- 620

621

## Figure legends

622 **Figure.1. SWELL1 mediates VRAC currents in human umbilical vein endothelial cells**

623 **(HUVECs). A,** SWELL1 western blot in HUVECs transduced with adenovirus expressing a short

624 hairpin RNA directed to Swell1 (Ad-shSWELL1) compared to control scrambled short hairpin

625 RNA (Ad-shSCR). GAPDH is used as loading control. **B,** Immunofluorescence staining of the

626 HUVECs transduced with Ad-shSWELL1 and Ad-shSCR. **C,** Current-time relationship of VRAC

627 (hypotonic, 210 mOsm) in Ad-shSCR transduced HUVEC and co-application of 10  $\mu$ M DCPIB.

628 **D,** Representative current traces upon hypotonic activation (left) during voltage steps (from -100

629 to +100 mV, shown in inset) and inhibition by DCPIB (right). **E,** Current-voltage relationship of

630 VRAC during voltage ramps from -100 mV to +100 mV after hypotonic swelling in HUVECs

631 transduced with Ad-shSCR and Ad-shSWELL1. **F.** Mean current outward and inward densities

632 at +100 and -100 mV ( $n_{\text{sh-SCR}}=4$  cells;  $n_{\text{shSWELL1}}=6$  cells). Data are shown as mean  $\pm$  s.e.m. \*p

633 <0.05; \*\*p <0.01; unpaired t-test for **F**.

634 **Figure 2. SWELL1 regulates PI3K-AKT-eNOS, ERK and mTOR signaling in endothelium.**

635 **(A),** Western blots of SWELL1, pAkt2, pAkt1, Akt2, Akt1, pErk1/2, Erk1/2, p-eNOS, eNOS,

636 pS6K ribosomal protein, S6K ribosomal protein, GAPDH, and  $\beta$ -Actin in Ad-shSCR and Ad-

637 shSWELL1 transduced HUVECS under basal conditions. Quantification of SWELL1/  $\beta$ -Actin

638 **(B),** p-eNOS/  $\beta$ -actin, p-eNOS/Total eNOS **(C),** pAkt2/  $\beta$ -actin, pAkt2/Total Akt2 **(D),**

639 pAkt1/GAPDH, pAkt1/Total Akt1 **(E),** pERK1/2 /GAPDH, pErk1/2 /Total Erk1/2 **(F),** pS6

640 ribosomal protein/GAPDH, and pS6K ribosomal protein/Total S6K ribosomal protein **(G).** N=6

641 independent experiments. Significance between the indicated groups in all blots were calculated

642 using a two-tailed Student's t-test. P-values are illustrated on figures. Error bars represent mean

643  $\pm$  s.e.m.

644

645 **Figure 3. SWELL1 interacts with Grb2, Cav1 and eNOS in human endothelium**

646 **A**, GRB2 immunoprecipitation from Ad-shSCR and Ad-shSWELL1 transduced HUVECs and  
647 immunoblot with SWELL1, Cav1 and GRB2 antibodies. Densitometry values for GRB2 co-  
648 immunoprecipitated SWELL1 (SWELL1/GRB2) and GRB2 co-immunoprecipitated Cav1  
649 (Cav1/GRB2). GAPDH serves as loading control for input samples. **(B)** GRB2  
650 immunoprecipitation from Ad-shSCR and Ad-shSWELL1 transduced HUVECs and immunoblot  
651 with SWELL1, eNOS, Cav1 and GRB2 antibodies. Insulin-stimulation with 100 nM insulin for 10  
652 minutes. Densitometry values for GRB2 co-immunoprecipitated eNOS (eNOS/GRB2).  
653 Representative blots from 3 independent experiments. **(C)** Representative endogenous  
654 SWELL1 and eNOS immunofluorescence staining in Ad-shSCR and Ad-shSWELL1 transduced  
655 HUVECs. Representative image from 6 independent experiments. **(D-E)** Quantification of  
656 SWELL1 **(D)**,  $n = 6$  and eNOS **(E)**,  $n = 6$  immunofluorescence staining upon SWELL1 KD.  
657 Evidence of SWELL1-eNOS colocalization **(C)**, insets in plasma membrane **(i)** and perinuclear  
658 regions **(ii)**. Significance between the indicated groups are calculated using a two-tailed  
659 Student's t-test. P-values are indicated on figures. Error bars represent mean  $\pm$  s.e.m.

660

661 **Figure 4. SWELL1 is required for intact stretch-induced AKT-eNOS signaling**

662 **A**, Western blot of SWELL1, pAKT1, pAKT2, pERK1/2 in response to 30 minutes of 0.1% and  
663 5% static stretch in Ad-shSCR and Ad-shSWELL1 transduced HUVECs. GAPDH is used as a  
664 loading control. **(B-D)** Densitometry quantification from A of pAKT1 **(B)**, pAKT2 **(C)** and pErk1/2  
665 **(D)**. **(E)** Western blot of peNOS, SWELL1, in response to 5% static stretching for 5, 60 and 180  
666 min in Ad-shSCR and Ad-shSWELL1 transduced HUVECs. **(F)** Densitometry quantification from  
667 E of eNOS. GAPDH is used as a loading control. Significance between the indicated groups in



668 all blots were calculated using a two-tailed Student's t-test. P-values are illustrated on figures.

669 Error bars represent mean  $\pm$  s.e.m.

670

671 **Figure 5. Endothelium-specific SWELL1 KO mice exhibit enhanced tube formation from**  
672 **aortic explants**

673 **A**, Strategy for endothelium targeted SWELL1 ablation to generate eSWELL1 KO. **(B)** Isolation  
674 of murine primary endothelial cells from WT and eSWELL1 KO using tdTomato reporter mice.  
675 **C-D**, Current-voltage relationships of VRAC in isotonic (Iso, 300 mOsm) and hypotonic (Hypo,  
676 210 mOsm) solution in response to voltage ramps from -100 to +100 mV over 500 ms in WT **(C)**  
677 and KO **(D)** primary murine endothelial cells. DCPIB (10  $\mu$ M) inhibition in C (WT). **(E)** Mean  
678 outward (+100mV) and inward (-100 mV) currents from WT (n=3 cells) and eSWELL1 KO (n = 3  
679 cells). **(F)** Ex-vivo aorta sprouting assay performed in aortic rings isolated from WT and  
680 eSWELL1 KO mice and cultured in FGM media for 3 days at 37oC. Immunofluoresence staining  
681 with antibodies to SWELL1 (green), CD31 (red), SWELL1+CD31+ (Merge) and bright field  
682 images show endothelial cell tubes sprouting from WT and eSWELL1 KO aortic rings (black  
683 arrow heads). **(G-I)** Quantification of SWELL1 immunofluorescence signal **(G**, WT = 15, KO =  
684 15), number of tip cells **(H**, WT = 26, KO = 31), and endothelial tube length **(I**, WT = 30, KO =  
685 30) in WT and eSWELL1 KO aortic explants. Statistical significance between the indicated  
686 values calculated using a two-tailed Student's t-test. P-values are illustrated on figures. Error  
687 bars represent mean  $\pm$  s.e.m. n = 3, independent experiments.

688

689 **Figure 6. RNA sequencing of Ad-shSCR and Ad-shSWELL1 transduced HUVECs.**

690 **A**, Heatmap analysis displaying top 25 upregulated or 25 downregulated genes between  
691 shSCR and shSWELL1. **(B)** IPA canonical pathway analysis of genes significantly regulated by  
692 shSWELL1 in comparison to shSCR. n = 3 for each group. For analysis with IPA, FPKM cutoffs

693 of 1.5, fold change of  $\geq 1.5$ , and false discovery rate  $< 0.05$  were utilized for significantly  
694 differentially regulated genes.

695

696 **Figure 7. Endothelial-targeted SWELL1 deletion predisposes to systolic hypertension**

697 Tail-cuff systolic blood pressures of **(A)** male and **(B)** female WT (n = 5 males and 7 females)  
698 and eSWELL1 KO (n = 5 males and 12 females) mice. **(C)** Systolic blood pressures of male WT  
699 (n = 4) and eSWELL1 KO (n = 5) mice under basal conditions and after 4 weeks of chronic  
700 angiotensin II infusion. Statistical significance between the indicated values calculated using a  
701 two-tailed Student's t-test. P-values are illustrated on figures. Data are shown as mean  $\pm$  s.e.m.

702

703 **Figure 8. Endothelium-specific SWELL1 KO mice exhibit exacerbated impairments retinal**  
704 **microvascular disease in the setting of Type 2 diabetes**

705 **A**, Representative fluorescein retinal angiograms of WT (top) and eSWELL1 KO (bottom) male  
706 (left) and female (right) mice raised on a high-fat high sucrose (HFHS) diet. Inset shows  
707 magnified view of retinal vessels. Quantification of major vessel fluorescence intensity over time  
708 after i.p. fluorescein injection in **(B)** male (n = 3) and **(C)** female (n = 3) WT and eSWELL1 KO  
709 mice. **(D-K)** Quantification of total retinal vessel intensity **(D)**, Total vessel number **(E)**; Vessel  
710 diameter **(F)**; Minimum vessel diameter **(G)**; Vessel area **(H)**; Total vessel length **(I)**; Lacunarity  
711 **(J)**; Number of end points **(K)**; and Branching index **(L)** of retinal vessels in WT and eSWELL1  
712 KO mice. Statistical significance between the indicated values calculated using 2-way Anova for  
713 **B&C** and **D-L** using a two-tailed Student's t-test. P-values are illustrated on figures. Error bars  
714 represent mean  $\pm$  s.e.m.

715

716

## Supplementary Figure Legends

717 **Figure 2- Figure Supplement 1. SWELL1 regulates PI3K-AKT-eNOS, ERK and mTOR**  
718 **signaling in endothelium.**

719 **(A)**, Western blots of SWELL1, pAkt2, pAkt1, Akt, pErk1/2, Erk1/2, p-eNOS, eNOS, pS6K  
720 ribosomal protein, S6K ribosomal protein, and  $\beta$ -Actin in si-SCR and si-SWELL1 transduced  
721 HUVECS under basal conditions. Quantification of SWELL1/  $\beta$ -Actin **(B)**, p-eNOS/  $\beta$ -actin, p-  
722 eNOS/Total eNOS **(C)**, pAkt2/  $\beta$ -actin, pAkt2/Total Akt **(D)**, pAkt1/  $\beta$ -actin, pAkt1/Total Akt **(E)**,  
723 pERK1/2 /  $\beta$ -actin, pErk1/2 /Total Erk1/2 **(F)**, pS6 ribosomal protein/  $\beta$ -actin, and pS6K  
724 ribosomal protein/Total S6K ribosomal protein **(G)**. N=6 independent experiments. Significance  
725 between the indicated groups in all blots were calculated using a two-tailed Student's t-test. P-  
726 values are illustrated on figures. Error bars represent mean  $\pm$  s.e.m.

727

728 **Figure 3-Figure Supplement 1. SWELL1 co-localizes with eNOS and regulates eNOS**  
729 **expression** SWELL1 (green) and eNOS (red) immunofluorescence staining of HUVEC  
730 transduced with either Ad-shSCR or Ad-shSWELL1. Scale bar is 20  $\mu$ m. DAPI (blue) labels  
731 nuclei.

732

733 **Figure 8- Figure Supplement 1. Endothelium-specific SWELL1 KO mice exhibit mild**  
734 **retinal microvascular disease at baseline**

735 Representative fluorescein retinal angiograms of 13 week old WT **(A)** and eSWELL1 KO **(B)**  
736 mice raised on a regular diet. Inset shows magnified view of retinal vessels. **(C-E)** Quantification  
737 of major vessel fluorescence intensity over time after i.p. fluorescein injection **(C)**, maximum  
738 vessel diameter **(D)**, and minimum vessel diameter **(E)** in WT (n = 11 mice) and eSWELL1 KO

739 (n = 11 mice). **(F-K)** Quantification of explant area **(F)**, Lacunarity **(G)**, Vessel area **(H)**,  
740 Branching Index **(I)**, Number of end points **(J)**; and vessel length **(K)** in WT and eSWELL1 KO  
741 mice. Statistical significance between the indicated values calculated using a two-tailed  
742 Student's t-test. P-values are illustrated on figures. Error bars represent mean  $\pm$  s.e.m. Scale  
743 bar is 500  $\mu$ m.

744

745 **Figure 8- Figure Supplement 2. Endothelium-specific SWELL1 KO mice exhibit**  
746 **exacerbated impairments retinal microvascular disease in the setting of Type 2 diabetes**

747 Three representative fluorescein retinal angiograms of WT and eSWELL1 KO from male **(A)**  
748 and female **(B)** mice raised on a high-fat high sucrose (HFHS) diet for 10 months. Scale bar is  
749 500  $\mu$ m.

750

751 **Figure 8- Figure Supplement 3. Glucose tolerance (GTT) and insulin tolerance (ITT) are**  
752 **not altered in endothelium-specific SWELL1 KO mice (n = 13) compared to WT mice (n =**  
753 **8) raised on a high-fat high sucrose diet for 10 months.**

754

755

756

757

## Materials and Methods

758 **Animals:** The institutional animal care and use committee of the University of Iowa and  
759 Washington University School of Medicine approved all experimental procedures involving  
760 animals. All mice were housed in temperature, humidity and light controlled environment and  
761 allowed water access and food. Both male and female *Swell1<sup>fl/fl</sup>* (1, 2)(WT), *CDH5<sup>cre</sup>*; *Swell1<sup>fl/fl</sup>*  
762 (eSWELL1 KO) mice were generated and used in these studies. *CHD5<sup>Cre</sup>* mice were obtained  
763 from Dr. Kaikobad Irani (University of Iowa, IA). In a subset of experiments, 5-8 week old  
764 *Swell1<sup>fl/fl</sup>* and *CDH5<sup>cre</sup>*; *Swell1<sup>fl/fl</sup>* mice were switched to HFHS (High Fat high Sucrose rodent  
765 diet, Research Diets, Inc., Cat # D12331) for at least 10 months. *CDH5<sup>cre</sup>* mice were crossed  
766 with *Rosa26-tdTomato* (Jax# 007914) reporter mice to identify CDH5+ cells for primary  
767 endothelium patch-clamp studies.

768 **Antibodies.** Rabbit polyclonal anti-SWELL1 antibody was generated against the epitope  
769 QRTKSRIEQGIVDRSE (Pacific Antibodies)(1). All other primary antibodies were purchased  
770 from Cells Signaling: anti- $\beta$ -actin (#8457), Total Akt (#4685S), Akt1 (#2938), Akt2 (#3063), p-  
771 eNOS (#9571), Total eNOS (#32027), p-AS160 (#4288), p-p70 S6 Kinase (#9205S), pS6  
772 Ribosomal (#5364S), GAPDH (#5174), pErk1/2 (#9101), Total Erk1/2 (#9102). Anti-SWELL1  
773 antibody was custom made as described previously (1, 2). Purified mouse anti-Grb2 was  
774 purchased from BD (610111) and Santa Cruz (#sc-255). Rabbit IgG Santa Cruz (sc-2027). Anti-  
775 CD31 was purchased from Thermo Fisher (MA3105).

776 **Electrophysiology.** All recordings were performed in the whole-cell configuration at room  
777 temperature, as previously described(1, 2). Briefly, currents were measured with either an  
778 Axopatch 200B amplifier or a MultiClamp 700B amplifier (Molecular Devices) paired to a  
779 Digidata 1550 digitizer. Both amplifiers used pClamp 10.4 software. The intracellular solution  
780 contained (in mM): 120 L-aspartic acid, 20 CsCl, 1 MgCl<sub>2</sub>, 5 EGTA, 10 HEPES, 5 MgATP, 120

781 CsOH, 0.1 GTP, pH 7.2 with CsOH. The extracellular solution for hypotonic stimulation  
782 contained (in mM): 90 NaCl, 2 CsCl, 1 MgCl<sub>2</sub>, 1 CaCl<sub>2</sub>, 10 HEPES, 5 glucose, 5 mannitol, pH  
783 7.4 with NaOH (210 mOsm/kg). The isotonic extracellular solution contained the same  
784 composition as above except for mannitol concentration of 105 (300 mOsm/kg). The osmolarity  
785 was checked by a vapor pressure osmometer 5500 (Wescor). Currents were filtered at 10 kHz  
786 and sampled at 100  $\mu$ s interval. The patch pipettes were pulled from borosilicate glass capillary  
787 tubes (WPI) by a P-87 micropipette puller (Sutter Instruments). The pipette resistance was ~4-6  
788 M $\Omega$  when the patch pipette was filled with intracellular solution. The holding potential was 0 mV.  
789 Voltage steps (500 ms) were elicited from 0 mV holding potential from -100 to +100 mV in 20  
790 mV increments every 0.6 s. Voltage ramps from -100 to +100 mV (at 0.4 mV/ms) were applied  
791 every 4 s.

792

793 **Adenoviral knockdown.** HUVECs were plated at 550,000 cell/well in 12 well plates. Cells were  
794 grown for 24 h in the plates and transduced with either human adenovirus type 5 with  
795 shLRRC8A (shSWELL1: Ad5-mCherry-U6-hLRRC8A-shRNA, 2.2X10<sup>10</sup> PFU/ml, (shADV-  
796 214592), Vector Biolabs), or a scrambled non-targeting control (shSCR: Ad5-U6-scramble-  
797 mCherry, 1X10<sup>10</sup> PFU/ml) at a multiplicity of infection (MOI) of 50 for 12 hours, and studies  
798 performed 3-4 days after adenoviral transduction. The shLRRC8a targeting sequence is: GCA  
799 CAA CAT CAA GTT CGA CGT.

800

801 **siRNA knockdown:** HUVECs were plated at 360,000 cell/well in 6 well plate. Cells were grown  
802 for 24 h (90-95% confluency) and transduced with either a silencer select siRNA with si-  
803 LRRC8a (Cat#4392420, sense: GCAACUUCUGGUUCAAUUTT antisense:  
804 AAUUUGAACCAGAAGUUGCTG, Invitrogen) or a non-targeting control silencer select siRNA  
805 (Cat# 4390846, Invitrogen), as described previously (3). The siLRRC8a used targets a different

806 sequence from the shRNA described above. Briefly, siRNAs were transduced twice, 24 and 72  
807 hours after HUVEC plating. Each siRNA was combined with Opti-MEM (285.25  $\mu$ l, Cat#11058-  
808 021, Invitrogen) siPORT™ amine (8.75  $\mu$ l, Cat#AM4503, Invitrogen) and the silencer select  
809 siRNA (6  $\mu$ l) in a final volume of 300  $\mu$ l. HUVECs were transduced over a 4-hour period at 37°C,  
810 using DMEM media +1% FBS. After transduction, the cells were returned to media containing  
811 M199, 20% FBS, 0.05 g Heparin Sodium Salt, and 15 mg ECGS. Cell lysates were collected at  
812 basal conditions on day 4.

813

#### 814 ***Isolation of mouse lung endothelial cells***

815 Isolation of mouse lung endothelial cells was performed according to the following protocol: Day  
816 1- Incubate sheep anti-rat IgG Dynabeads (Invitrogen) overnight with PECAM (Sigma,  
817 #SAB4502167) and VEGFR2 (R&D Systems, #BAF357) antibodies at 4 °C in PBS with gentle  
818 agitation. Day 2- lungs were removed from the mice, washed in 10% FBS/DMEM, minced into  
819 1-2 mm squares and digested with Collagenase Type I (2 mg/ml, Gibco) at 37°C for 1 hour with  
820 agitation. The cellular digest was filtered through a 70  $\mu$ m cell strainer, centrifuged at 1500 rpm  
821 and the cells immediately incubated with the antibody coated Dynabeads at room temperature  
822 for 20 minutes. The bead-bound cells were recovered with a magnet, washed two times with  
823 PBS, and plated overnight on collagen type I (100ug/ml) coated cover slips. The endothelial  
824 cells were maintained in a growth media of M199, 20% FBS, 0.05g Heparin Sodium Salt,  
825 50mg/ml ECGS, and 1x Anti-Anti.

826 ***Cells Culture:*** HUVECs were purchased from ATCC and were grown in MCDB-131- Complete  
827 media overnight. HUVECs for basal condition collection were grown in growth media of M199,  
828 20% FBS, 0.05g Heparin Sodium Salt (Cat#9041-08-1, Alfa Aesar), and 15 mg ECGS (Cat#02-  
829 102, Millipore Sigma). Cells were routinely cultured on 1% of gelatin coated plates at 37°C at

830 5% CO<sub>2</sub>. For insulin stimulation (Cat#SLBW8931), cells were serum starved for at least 13 h in  
831 1% FBS (Atlanta Bio selected, Cat #S11110) or without FBS using endothelial cells growth  
832 basal medium (Lonza cat#cc-3121) instead of MCDB-131- complete media. Insulin stimulation  
833 was used for the times indicated at 100 nM.

834 **Immunoblotting:** Cells were harvested in ice-cold lysis buffer (150 mM NaCl, 20 mM HEPES,  
835 1% NP-40, 5mM EDTA, pH 7.5) with added proteinase/phosphatase inhibitor (Roche). Cells  
836 were kept on ice with gentle agitation for 20 minutes to allow complete lysis. Lysate scraped into  
837 1.5 ml tubes and cleared of debris by centrifugation at 14,000 x g for 20 minutes at 4 °C.  
838 Supernatant were transferred to fresh tube and solubilized protein was measured using a DC  
839 protein assay kit (Bio-Rad). For immunoblotting an appropriate volume of 1 x Laemmli (Bio-rad)  
840 sample loading buffer was added to the sample (10 µg of protein), which then heated at 90°C  
841 for 5 min before loading onto 4-20% gel (Bio-Rad). Proteins were separated using running  
842 buffer (Bio-Rad) for 2 h at 150 V. Proteins were transferred to PVDF membrane (Bio-Rad) and  
843 membrane blocked in 5% (w/v) BSA in TBST or 5 % (w/v) milk in TBST at room temperature for  
844 2 hours. Blots were incubated with primary antibodies at 4 °C overnight, followed by secondary  
845 antibody (Bio-Rad, Goat-anti-mouse #170-5047, Goat-anti-rabbit #170-6515, all used at  
846 1:10000) at room temperature for one hour. Membranes were washed 3 times and incubated in  
847 enhanced substrate Clarity (Bio-Rad) and imaged using a ChemiDoc XRS using Image Lab  
848 (Bio-Rad) for imaging and analyzing protein band intensities. β-Actin or GAPDH levels were  
849 quantified to correct for protein loading.

850 **Immunoprecipitation:** Cells were seeded on gelatin-coated 10 cm dishes in complete media  
851 for 24 h. Adenoviruses, Ad5-mCherry-U6-hLRRC8A-shRNA or Ad5-U6-scramble-mCherry were  
852 added to cells for 12h. After 4 days cells were serum starved for 16 h with basal media contain  
853 1% serum before stimulation with insulin (10 nM/ml). Cells were harvested in ice-cold lysis  
854 buffer (150 mM NaCl, 20 mM HEPES, 1% NP-40, 5mM EDTA, pH 7.5) with added



855 proteinase/phosphatase inhibitor (Roche) and kept on ice with gentle agitation for 15 minutes to  
856 allow complete lysis. Lysates were incubated with anti-Grb2 antibody (20 µg/ml) or control rabbit  
857 IgG (20 µg/ml, Santa Cruz sc-2027) rotating end over end overnight at 4 °C. Protein G  
858 sepharose beads (GE) were added to this for a further 4 h before samples were centrifuged at  
859 10,000 x g for 3 minutes and washed three times with RIPA buffer and re-suspended in Laemmli  
860 buffer (Bio-Rad), boiled for 5 minutes, separated by SDS-PAGE gel followed by the western blot  
861 protocol.

862

863 **Stretch assay:** Equal amounts of cells were plated in each well in 6 well plated BioFlex coated  
864 with Laminin (BF-3001CCase) culture plate and seeded to approximately 90% confluence.  
865 Plates were placed into a Flexcell Jr. Tension System (FX-6000T), and incubated at 37°C with  
866 5% CO<sub>2</sub>. Prior to stretch-stimulation, basal media of 1% FBS was added for 16 h. Cells on  
867 flexible membrane were subjected to static stretch with following parameters: a stretch of 0.1%  
868 and 5% with static strain. Cells were stretched for 5, 30, 60 or 180 minutes. Cells were then  
869 lysed and protein isolated for subsequent Western blots.

870 **Immunofluorescence imaging:** Cells were plated on gelatin-coated glass coverslips. Cells on  
871 cover slip were washed in PBS and fixed with 2% (w/v) PFA for 20 minutes at room  
872 temperature. PFA were washed three times with PBS and permeabilized in PBS containing 0.2  
873 % Triton X-100 for 5 minutes at room temperature. Cells on coverslips were washed in PBS and  
874 blocked for 30 minutes at room temperature with TBS containing 0.1% Tween-20 and 5% BSA.  
875 Cells on coverslip were incubated overnight at 4°C with primary antibody (1:250) in TBS  
876 containing 0.1% Tween-20 and 1% BSA. Cells were then washed in PBS 5x and incubated for 2  
877 hours at room temperature with 5% BSA in TBST. Cells were washed three times in TBST and  
878 then incubated with secondary antibodies at 1:1000 dilution (Invitrogen, Anti-Rabbit 488,  
879 A11070; Anti-mouse 568, A11019; Anti-mouse 488, A11017) for 1 h at room temperature.

880 Coverslips were then incubated for 10 minutes with Topro 3 (T3605, Thermofisher) or mounted  
881 with mounting media containing DAPI (Invitrogen), to visualize nuclei. Images were taken using  
882 Axiocam 503 Mono Camera controlled by Zeiss Blue using a Plan-Apochromate 40x oil  
883 immersion objective.

884

885 ***Ex vivo sprouting angiogenesis assay.*** Following Avertin injection and cervical dislocation,  
886 aortas were dissected and connective tissue removed, and then washed with PBS with 50 µg/ml  
887 penicillin and streptomycin. Using iris scissors, the aorta was cut into aortic rings of 1~2 mm  
888 cross sectional slices. 50 µl of Matrigel was used to coat the center of coverslips in 24 well  
889 plates for two hours at 37 °C in the incubator to solidify the Matrigel. Aorta rings were then  
890 seeded and transplanted on Matrigel (BD Biosciences, Cat#356231) on coverslips. After  
891 seeding the aortic rings, plates were incubated in 37 °C without medium for 10 minutes to allow  
892 the ring to attach to the Matrigel. Complete medium was added to each well and incubated at  
893 37°C with 5% CO<sub>2</sub> for 48-72 h. Phase contrast photos of individual explants were taken using a  
894 10x/0.75 NA objective Olympus IX73 microscope (Olympus, Japan) fitted with camera (Orca  
895 flash 4.0+, Hamamatsu, Japan). The areas of sprouting, number of tips cells and length of the  
896 tube for each condition were quantified with computer software ImageJ 1.52i (National Institute  
897 of Health). Cells were incubated with SWELL1 (1:250) and CD31 (1:250) primary antibodies in  
898 0.1% Tween-20 and 1% BSA overnight, and then incubated with secondary antibodies  
899 (Invitrogen, Anti-Rabbit 488, A11070; Anti-Mouse 568, A11019). Cells were then incubated for  
900 10 minutes with Topro 3 (T3605, Thermofisher) at room temperature.

901

902 ***Retina imaging.*** Ketamine (Akorn Animal Health, 100mg/ml) was prepared and mixed with  
903 Xylazine then stored at room temperature. Animals were anesthetized with 87.5/12.mg/kg BW  
904 via intraperitoneal (IP) injection. Eyes were topically anesthetized with proparacaine and dilated  
905 with tropicamide. Fluorescein (100 mg/ml, Akorn Inc) diluted with sterile saline was administered

906 by IP injection (50  $\mu$ l), mice positioned on Micron imaging platform. Images of the eyes were  
907 taken from the start of fluorescein infusion with the Micron camera with a 450-650 nm excitation  
908 filter and 469-488 nm barrier filter at 30 frame/sec using Micron software for 30 seconds. Data  
909 were converted into tiff image for further analysis.

910

911 **Angiotensin-II infusion:** Infusion studies carried out using Azlet osmotic minipumps (Model  
912 1004). Angiotensin-II (BACHEM) dissolved in saline was filled in the minipumps and were  
913 prepared to maintain infusion rate of 600 ng/kg/min for four weeks. The mice were anesthetized  
914 under 2% isoflurane and the minipumps were implanted subcutaneously on the dorsal aspect  
915 of the mice.

916

917

#### 918 **Blood pressure recordings**

919 Systolic tail-cuff blood pressure (BP) measurements were carried out using computerized tail-  
920 cuff system BP-2000 (Visitech Systems) at the same time of day. Mice were first acclimated to  
921 the device by performing 3 days of measurements (20 sequential measurements/day) and then  
922 mean blood pressure readings were obtained by averaging 3-5 days of measurements (not  
923 inclusive of the 3 acclimation days).

924

#### 925 **RNA sequencing**

926 RNA quality was assessed by Agilent BioAnalyzer 2100 by the University of Iowa Institute of  
927 Human Genetics, Genomics Division. RNA integrity numbers greater than 8 were accepted for  
928 RNAseq library preparation. RNA libraries of 150 bp PolyA-enriched RNA were generated, and  
929 sequencing was performed on a HiSeq 4000 genome sequencing platform (Illumina).

930 Sequencing results were uploaded and analyzed with BaseSpace (Illumina). Sequences were  
931 trimmed to 125 bp using FASTQ Toolkit (Version 2.2.0) and aligned to *Mus musculus* mmp10

932 genome using RNA-Seq Alignment (Version 1.1.0). Transcripts were assembled and differential  
933 gene expression was determined using Cufflinks Assembly and DE (Version 2.1.0). Ingenuity  
934 Pathway Analysis (QIAGEN) was used to analyze significantly regulated genes which were  
935 filtered using cutoffs of >1.5 fragments per kilobase per million reads, >1.5 fold changes in gene  
936 expression, and a false discovery rate of <0.05. Heatmaps were generated to visualize  
937 significantly regulated genes. Data have been deposited in GEO (accession# TBD).

938

### 939 **Metabolic phenotyping**

940 Mice were fasted for 6 h prior to glucose tolerance tests (GTT). Baseline glucose levels at 0 min  
941 timepoint (fasting glucose, FG) were measured from blood sample collected from tail snipping  
942 using glucometer (Bayer Healthcare LLC). 0.75 g D-Glucose/kg body weight were injected (i.p.)  
943 for HFHS mice, respectively and glucose levels were measured at 7, 15, 30, 60, 90 and 120 min  
944 timepoints after injection. For insulin tolerance tests (ITTs), the mice were fasted for 4 h. Similar  
945 to GTTs, the baseline blood glucose levels were measured at 0 min timepoint and 15, 30, 60, 90  
946 and 120 min timepoints post-injection (i.p.) of insulin (HumulinR, 1.25 U/kg body weight).

947

948

### **References**

949

- 950 1. Kang C, Xie L, Gunasekar SK, Mishra A, Zhang Y, Pai S, et al. SWELL1 is a glucose  
951 sensor regulating beta-cell excitability and systemic glycaemia. *Nat Commun.*  
952 2018;9(1):367.
- 953 2. Zhang Y, Xie L, Gunasekar SK, Tong D, Mishra A, Gibson WJ, et al. SWELL1 is a  
954 regulator of adipocyte size, insulin signalling and glucose homeostasis. *Nature cell*  
955 *biology.* 2017;19(5):504-17.
- 956 3. Koh W, Stratman AN, Sacharidou A, and Davis GE. In vitro three dimensional collagen  
957 matrix models of endothelial lumen formation during vasculogenesis and angiogenesis.  
958 *Methods Enzymol.* 2008;443:83-101.

959

960

961

962

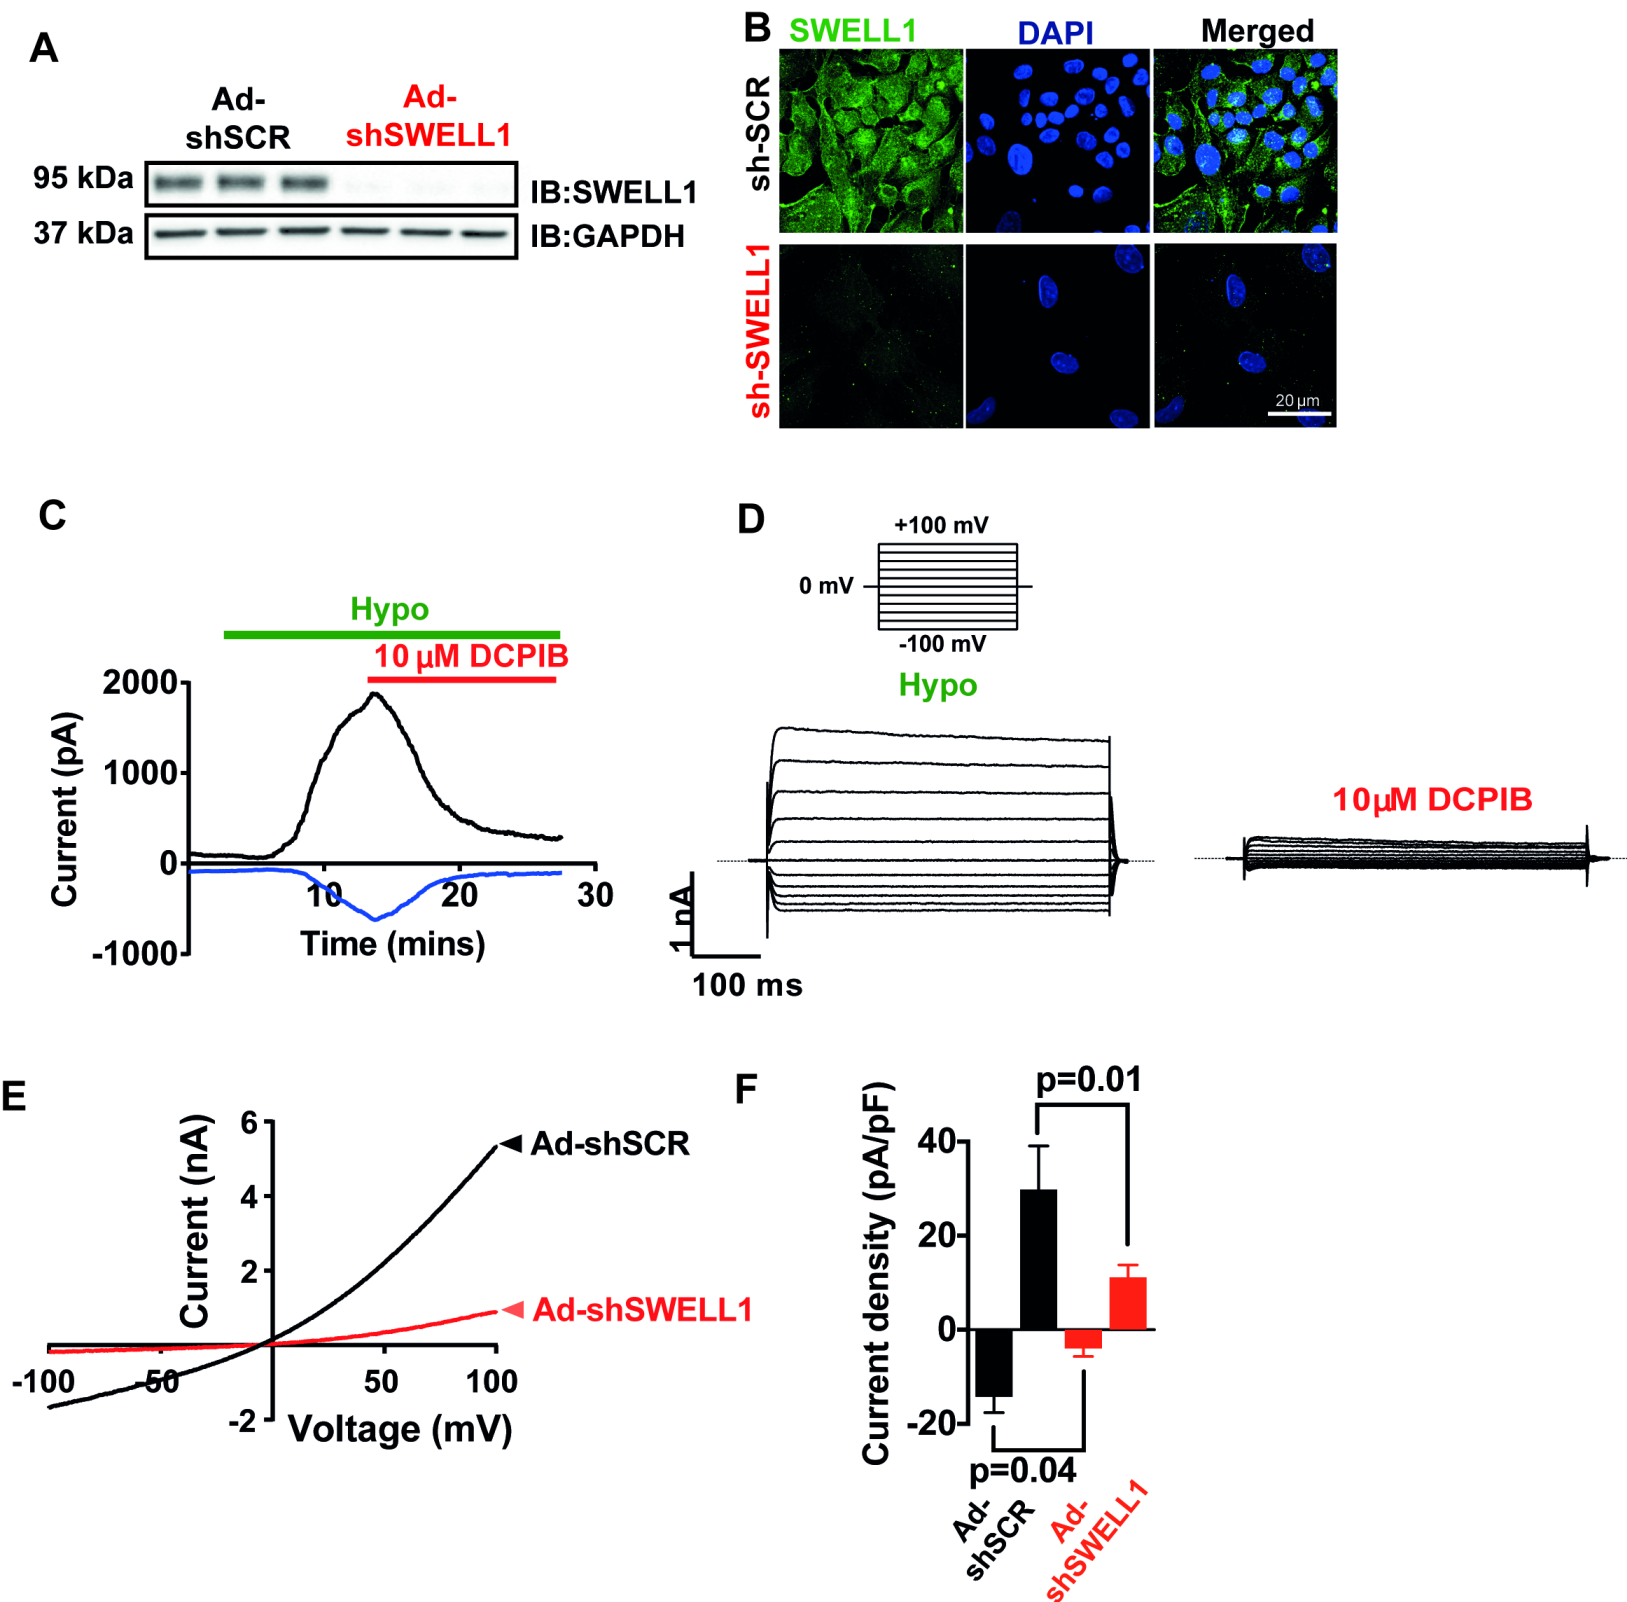

Figure 1. SWELL1 mediates VRAC currents in human umbilical vein endothelial cells (HUVECs).

**A**

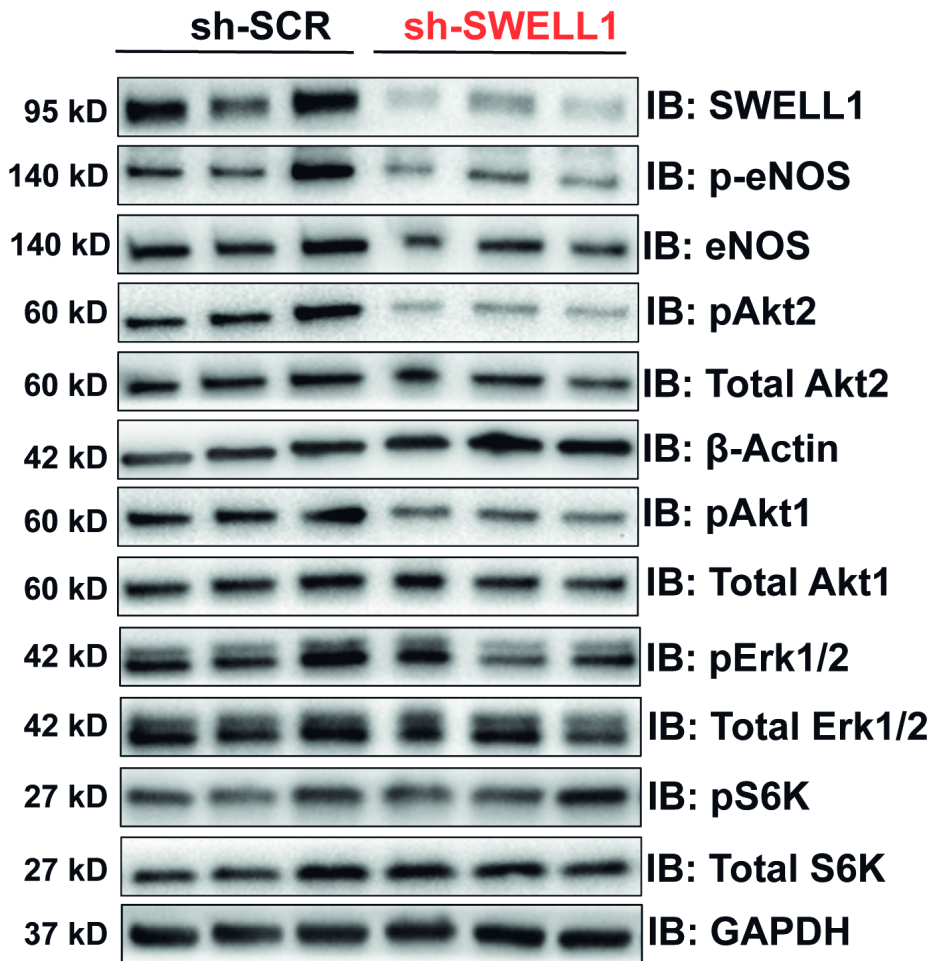

**B** SWELL1

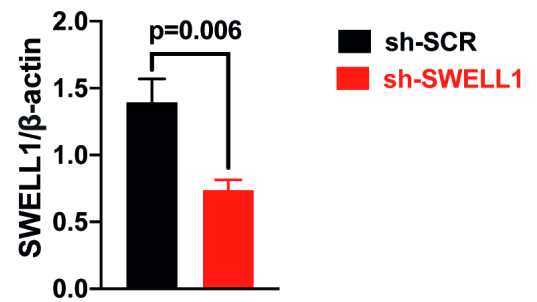

**C** p-eNOS

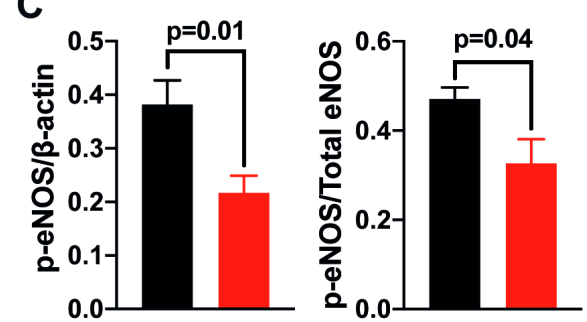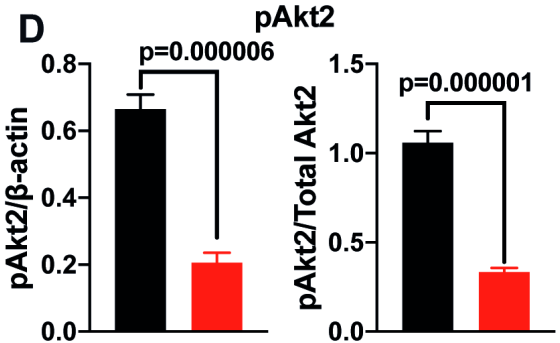

**E**

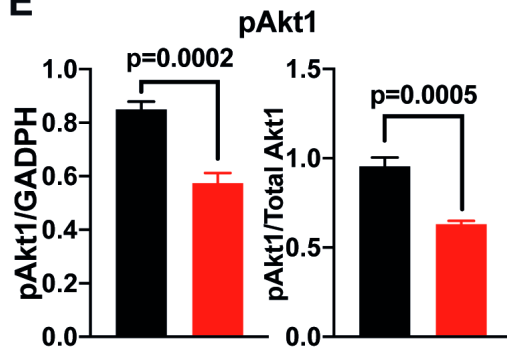

**F**

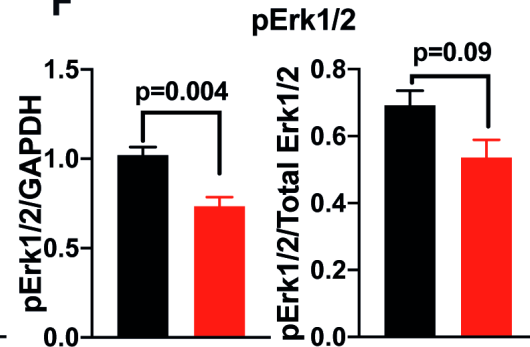

**G**

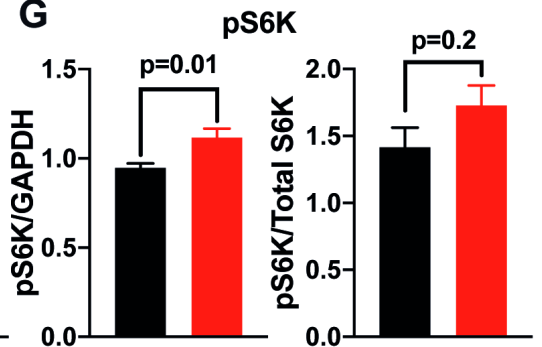

Figure 2. SWELL1 regulates PI3K-AKT-eNOS, ERK and mTOR signaling in endothelium.

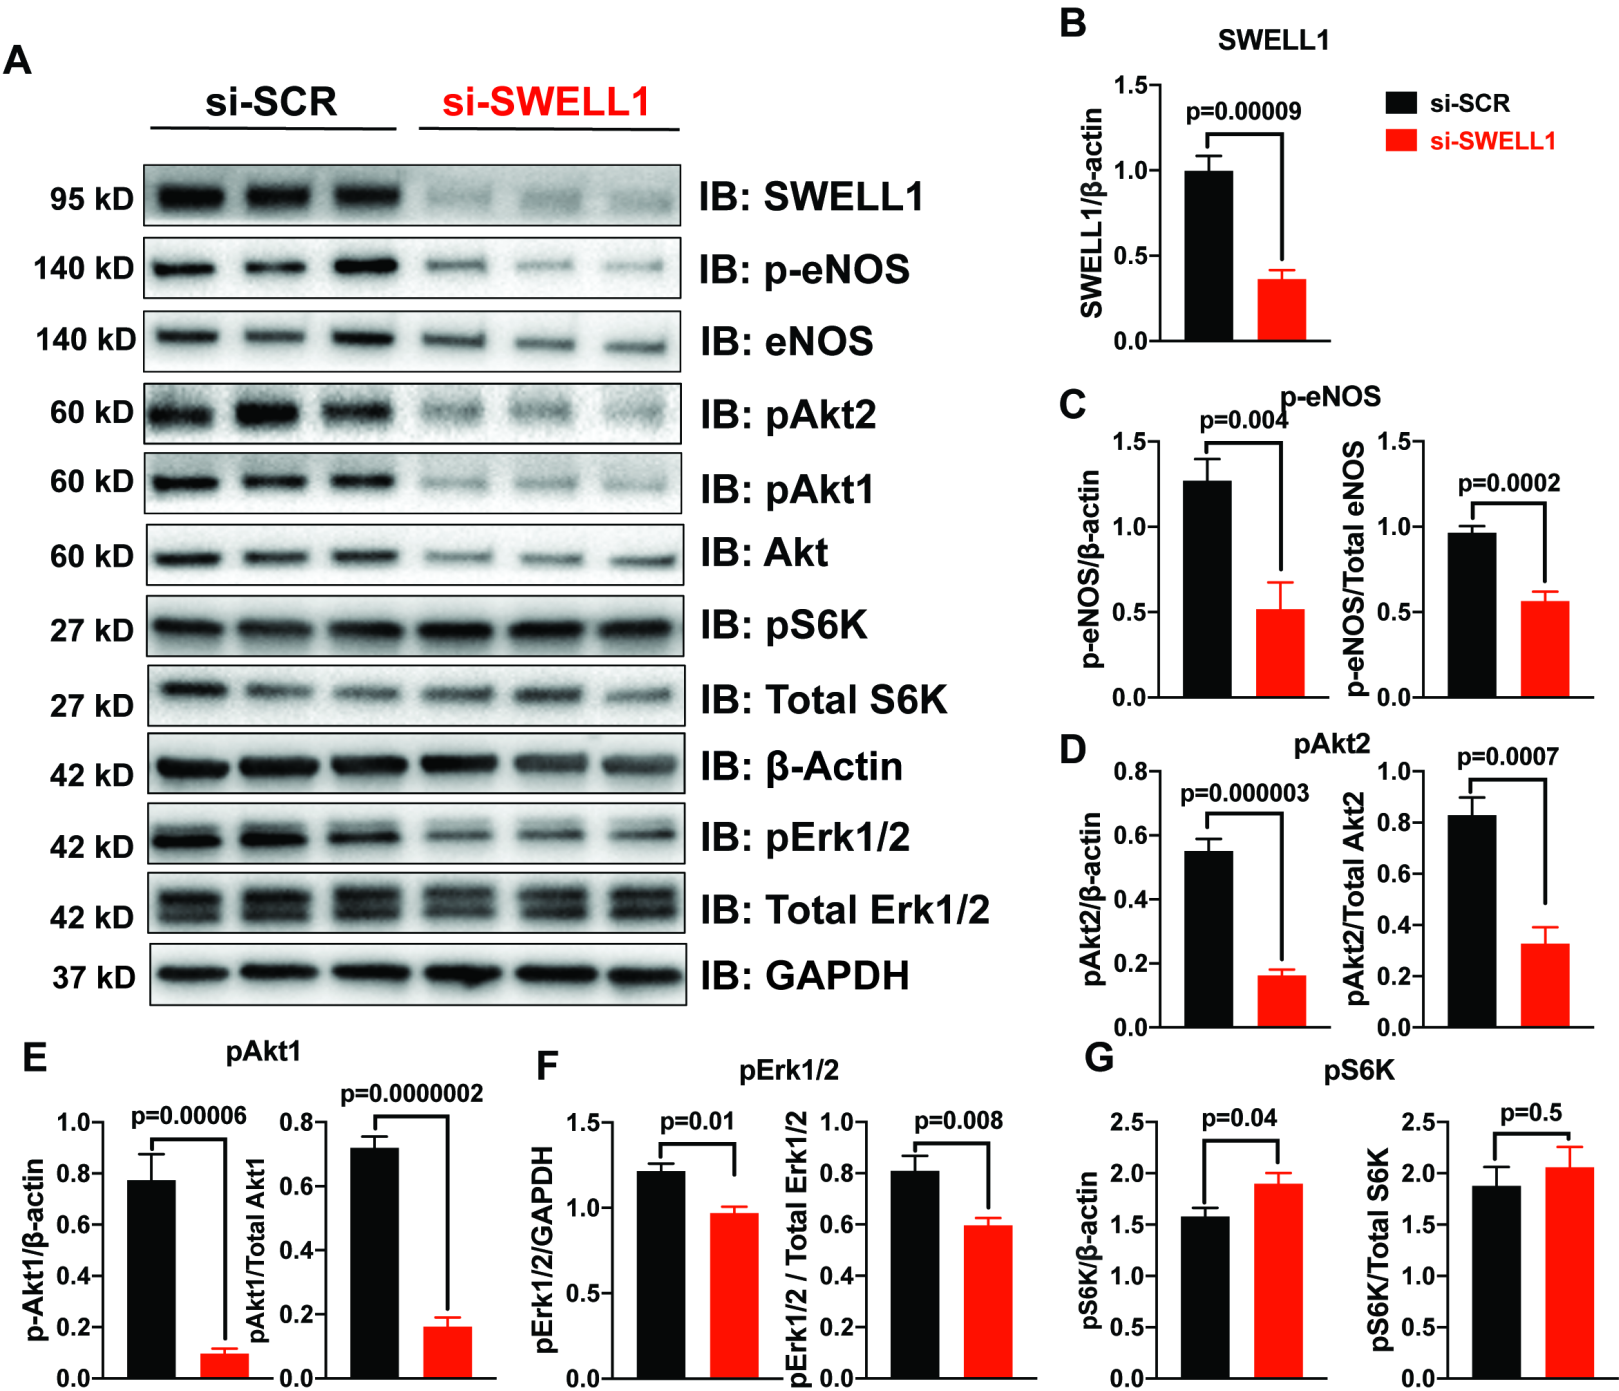

**Figure 2- Figure Supplement 1. SWELL1 regulates PI3K-AKT-eNOS, ERK and mTOR signaling in endothelium.**

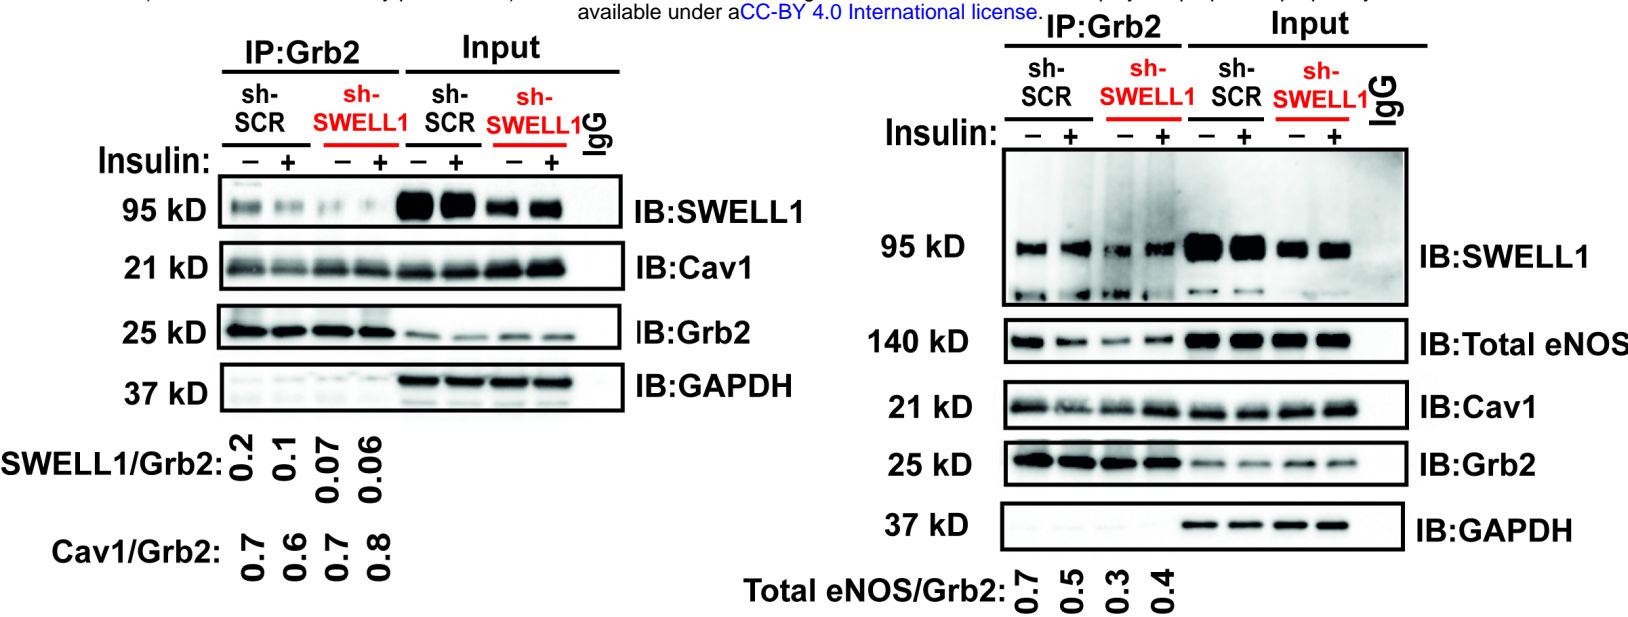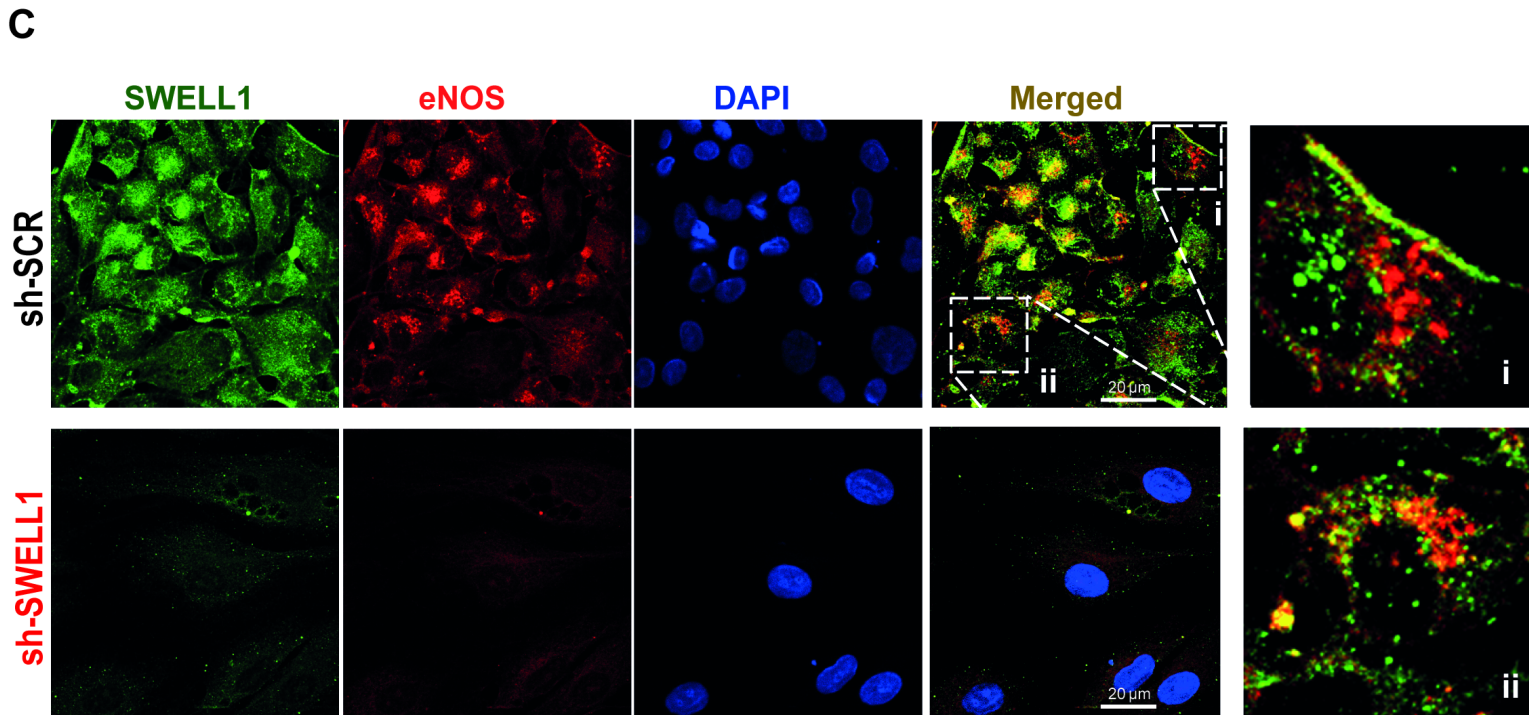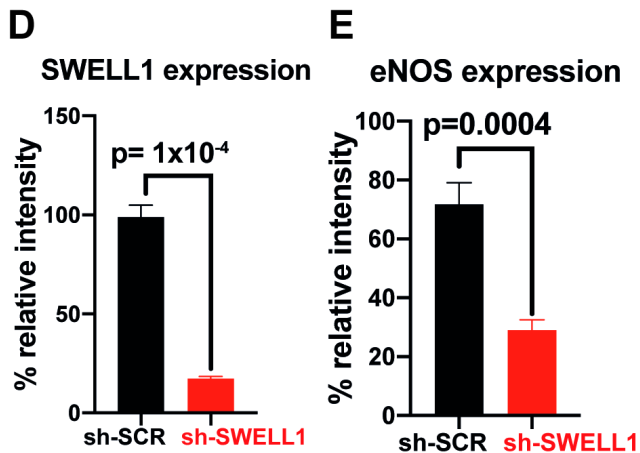

**Figure 3. SWELL1 interacts with Grb2, Cav1 and eNOS in human endothelium.**



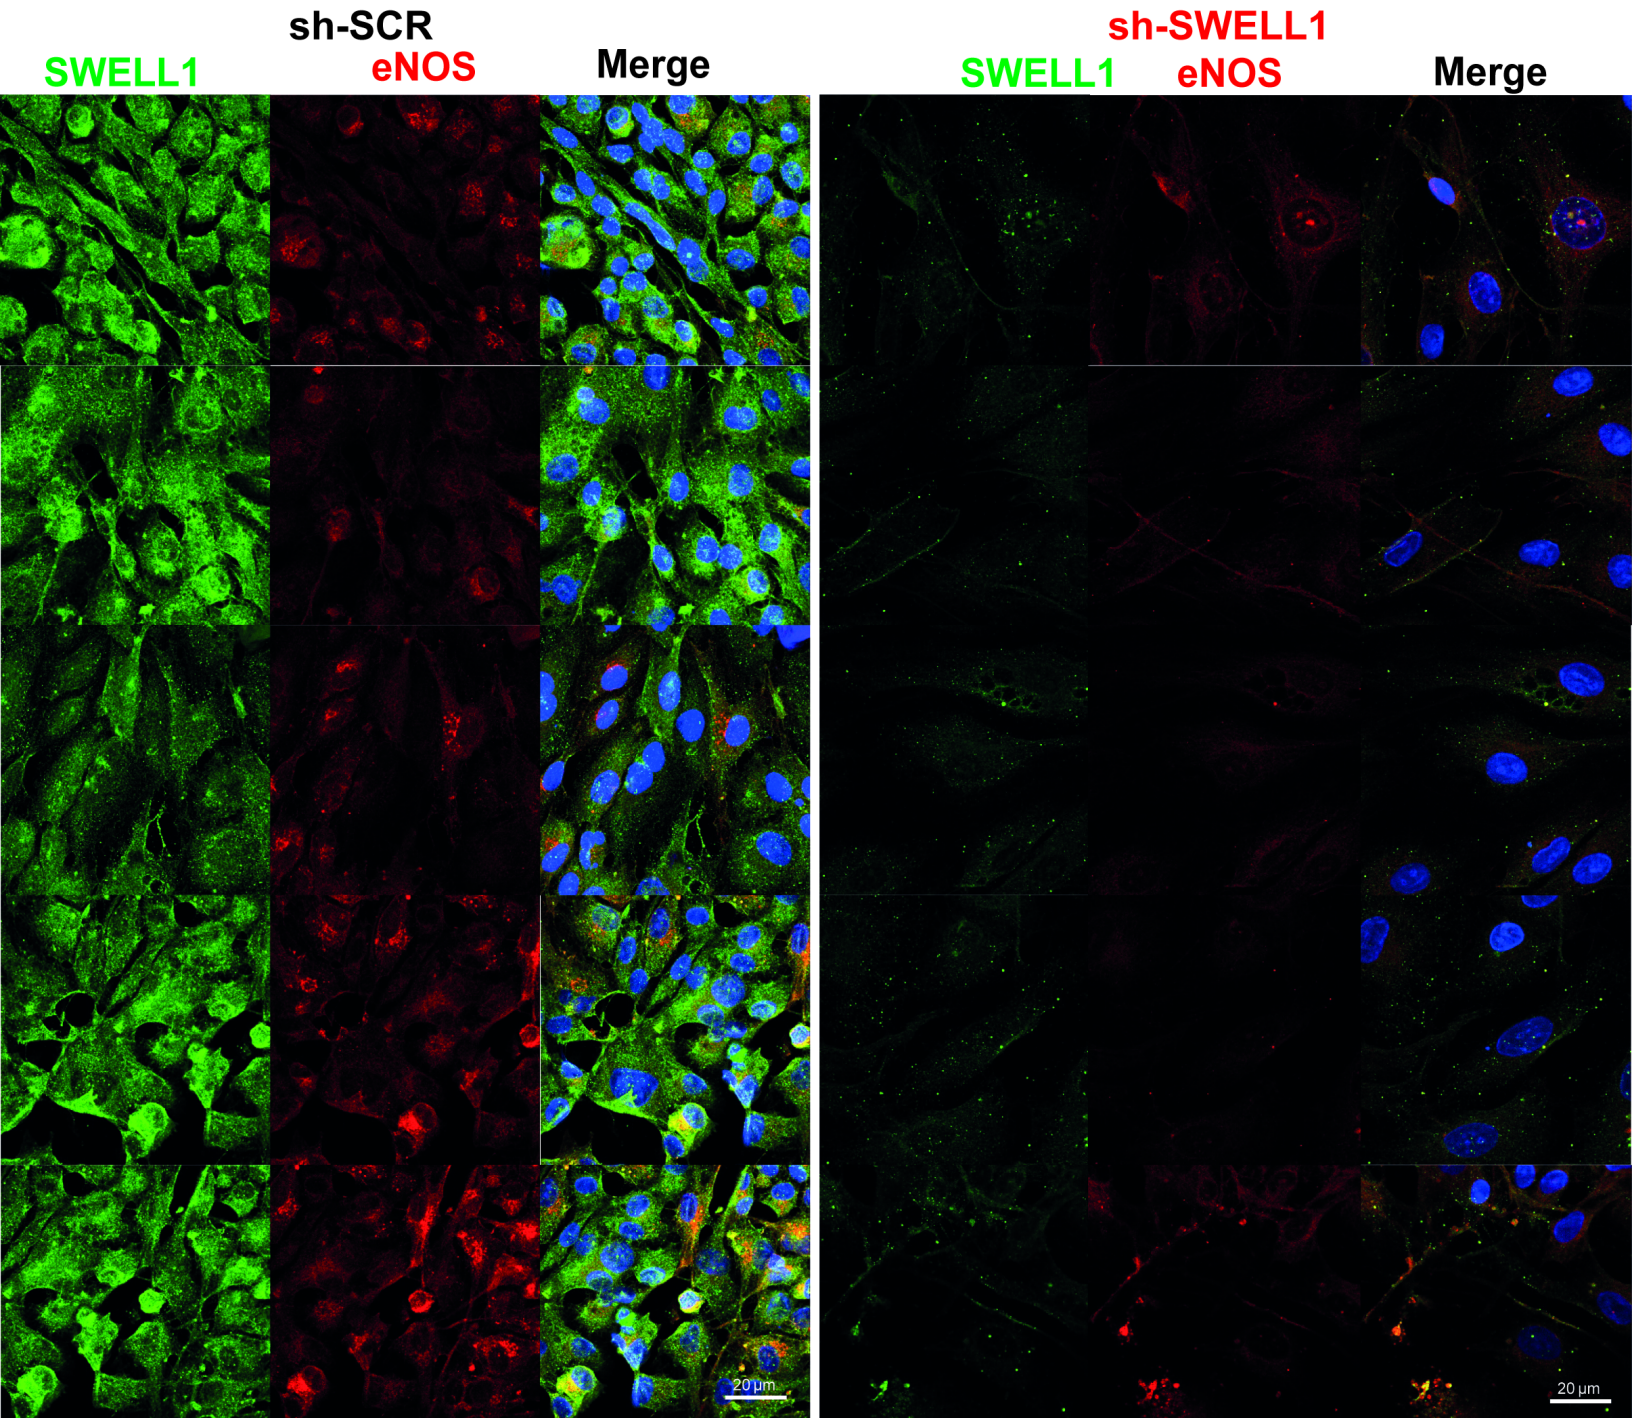

Figure 3 - Figure Supplement 1. SWELL1 co-localizes with eNOS and regulates eNOS expression.

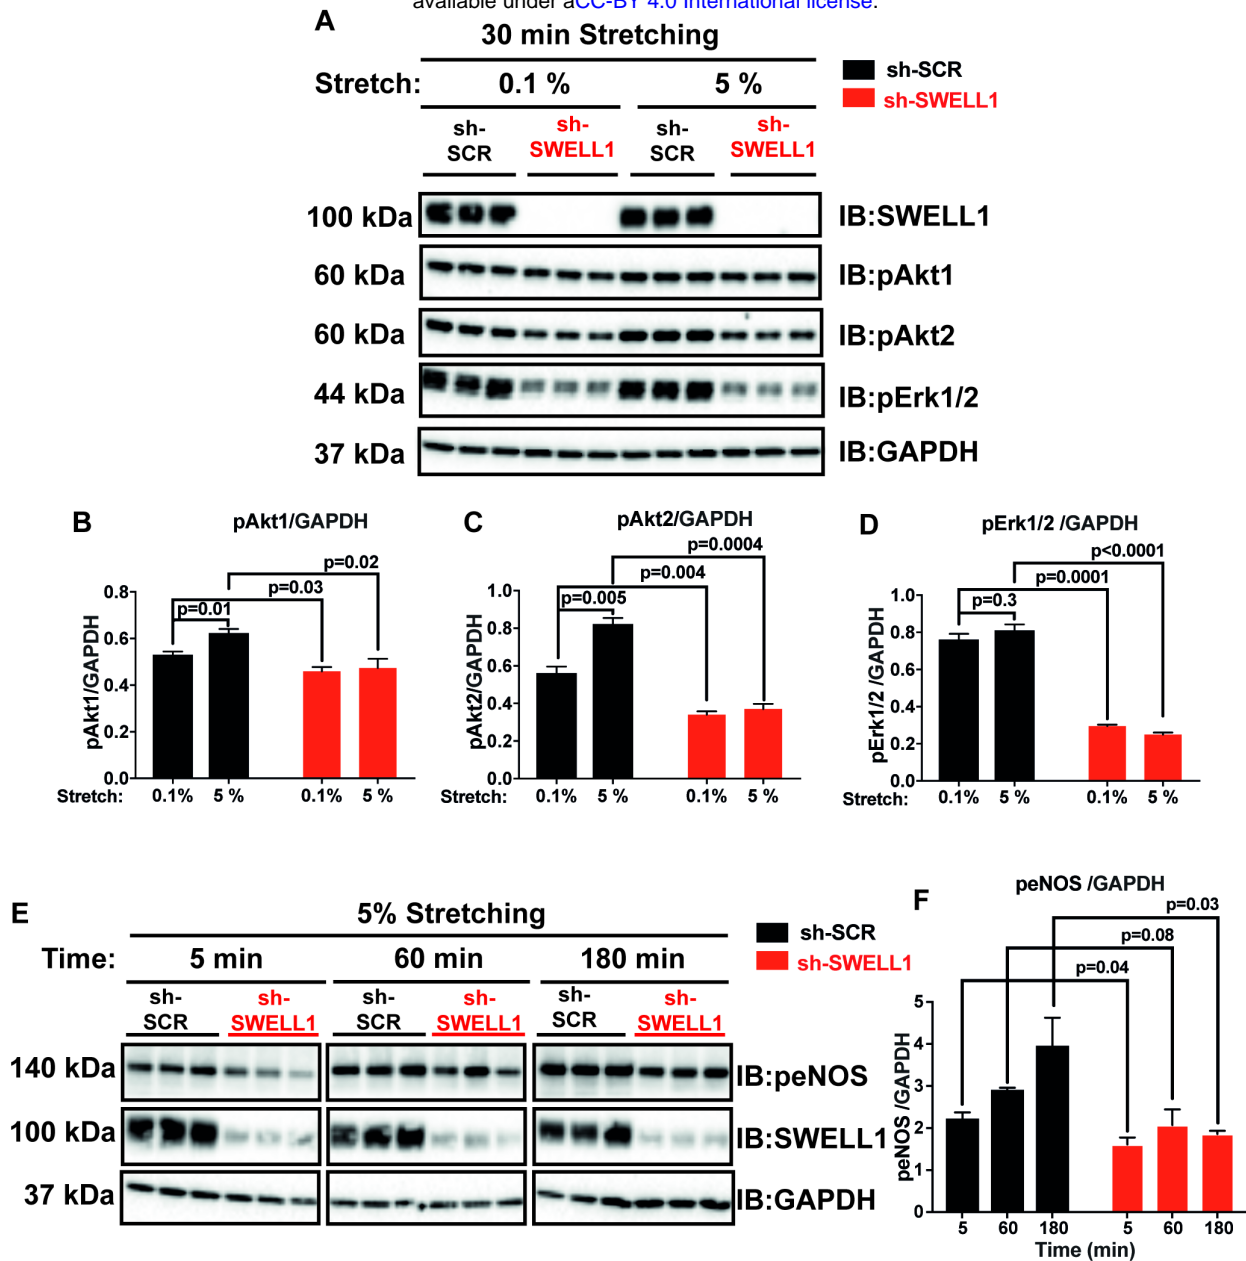

**Figure 4. SWELL1 is required for intact stretch-induced AKT-eNOS signaling.**

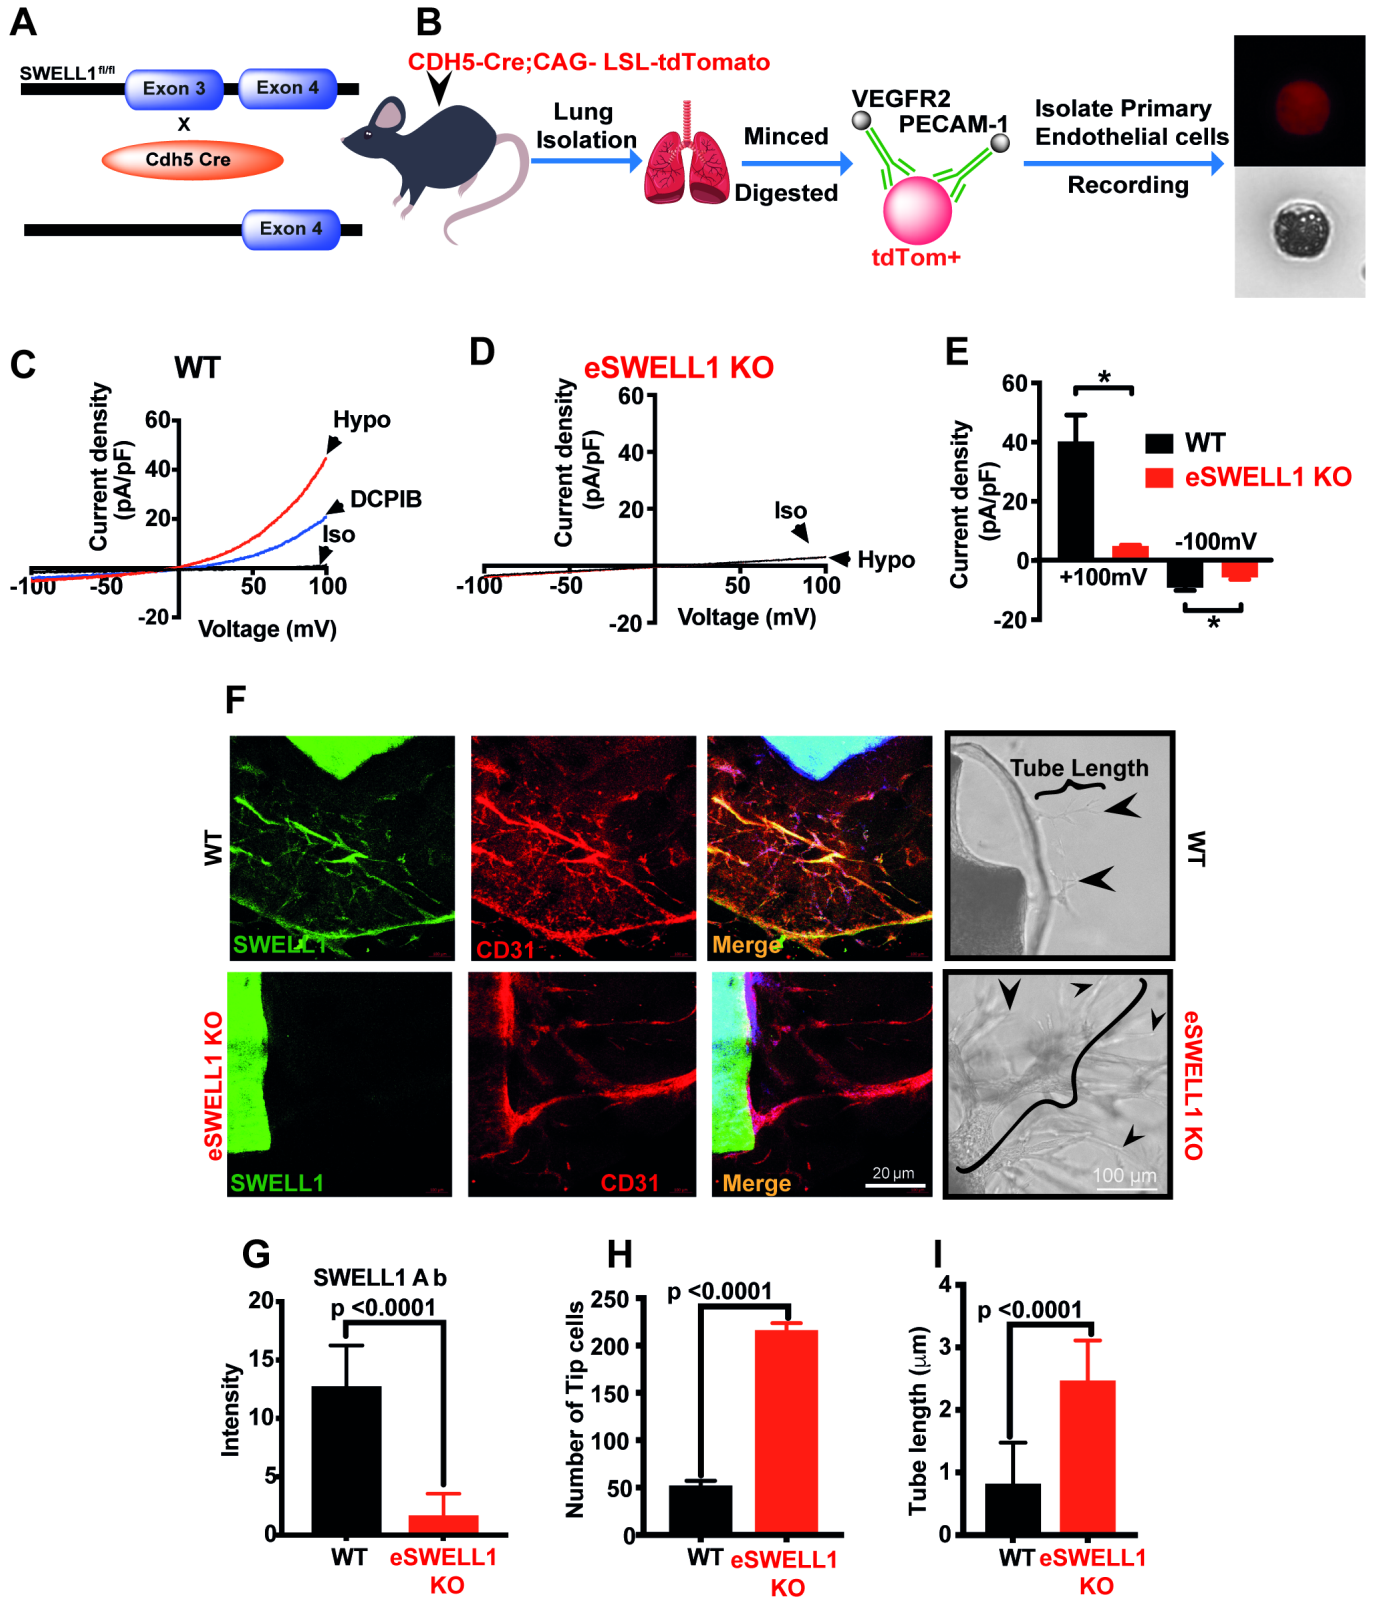

Figure 5. Endothelium-specific SWELL1 KO mice exhibit enhanced tube formation from aortic explants.

**A**

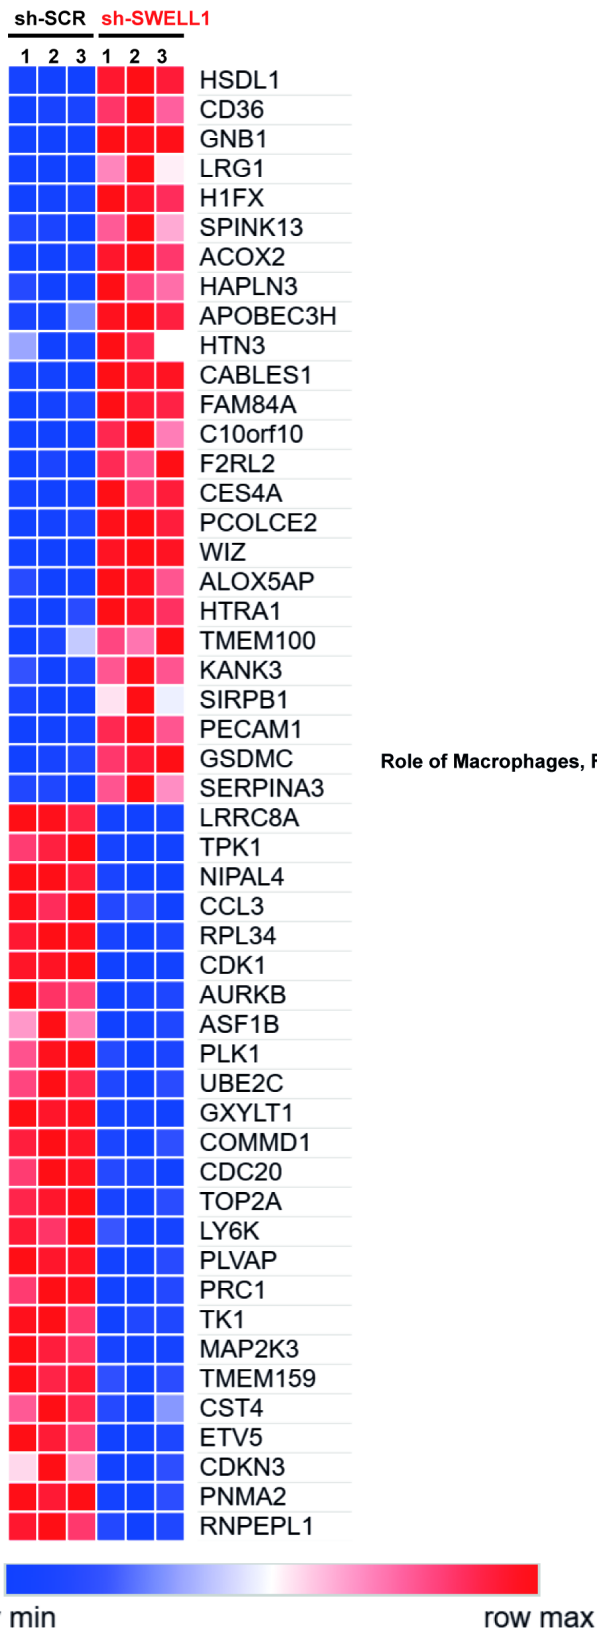

**B**

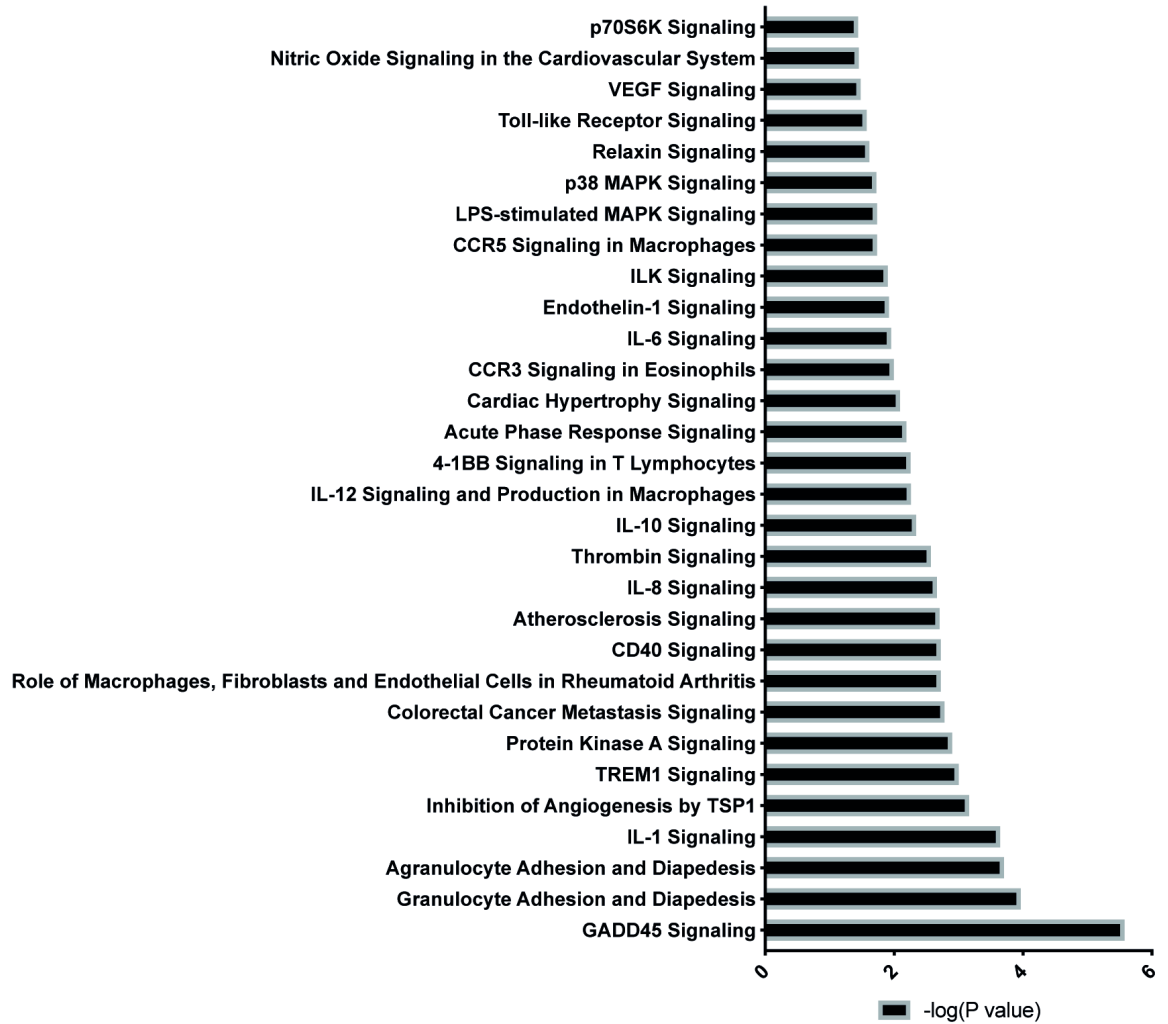

**Figure 6. RNA sequencing of Ad-shSCR and Ad-shSWELL1 transduced HUVECs.**

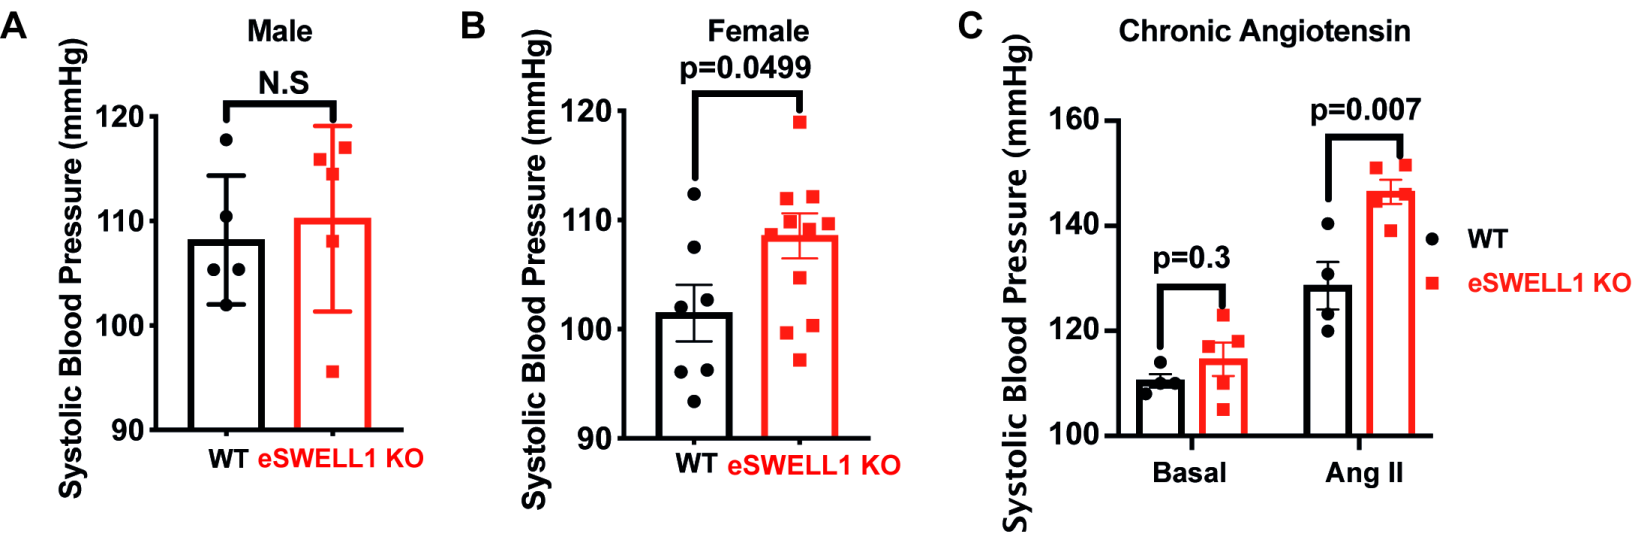

**Figure 7. Endothelial-targeted SWELL1 deletion predisposes to systolic hypertension.**

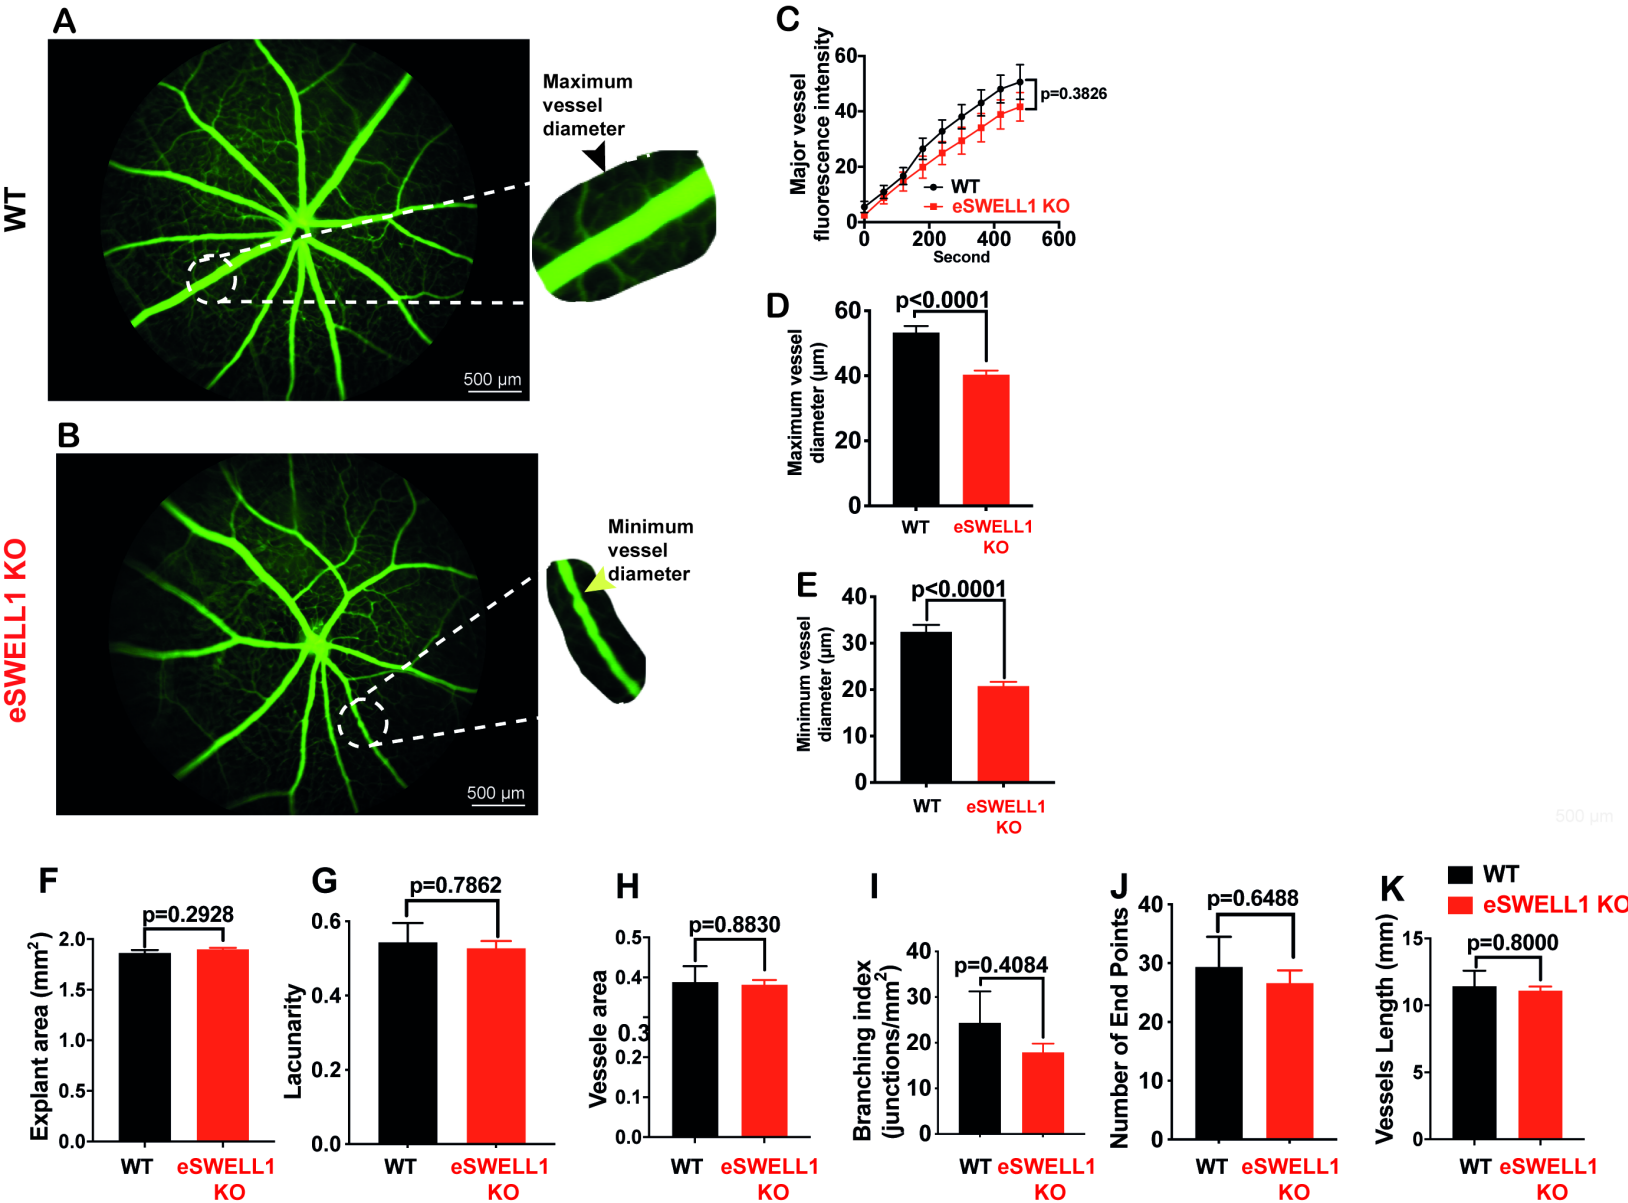

**Figure 8- Figure Supplement-1. Endothelium-specific SWELL1 KO mice exhibit mild retinal microvascular disease at baseline.**

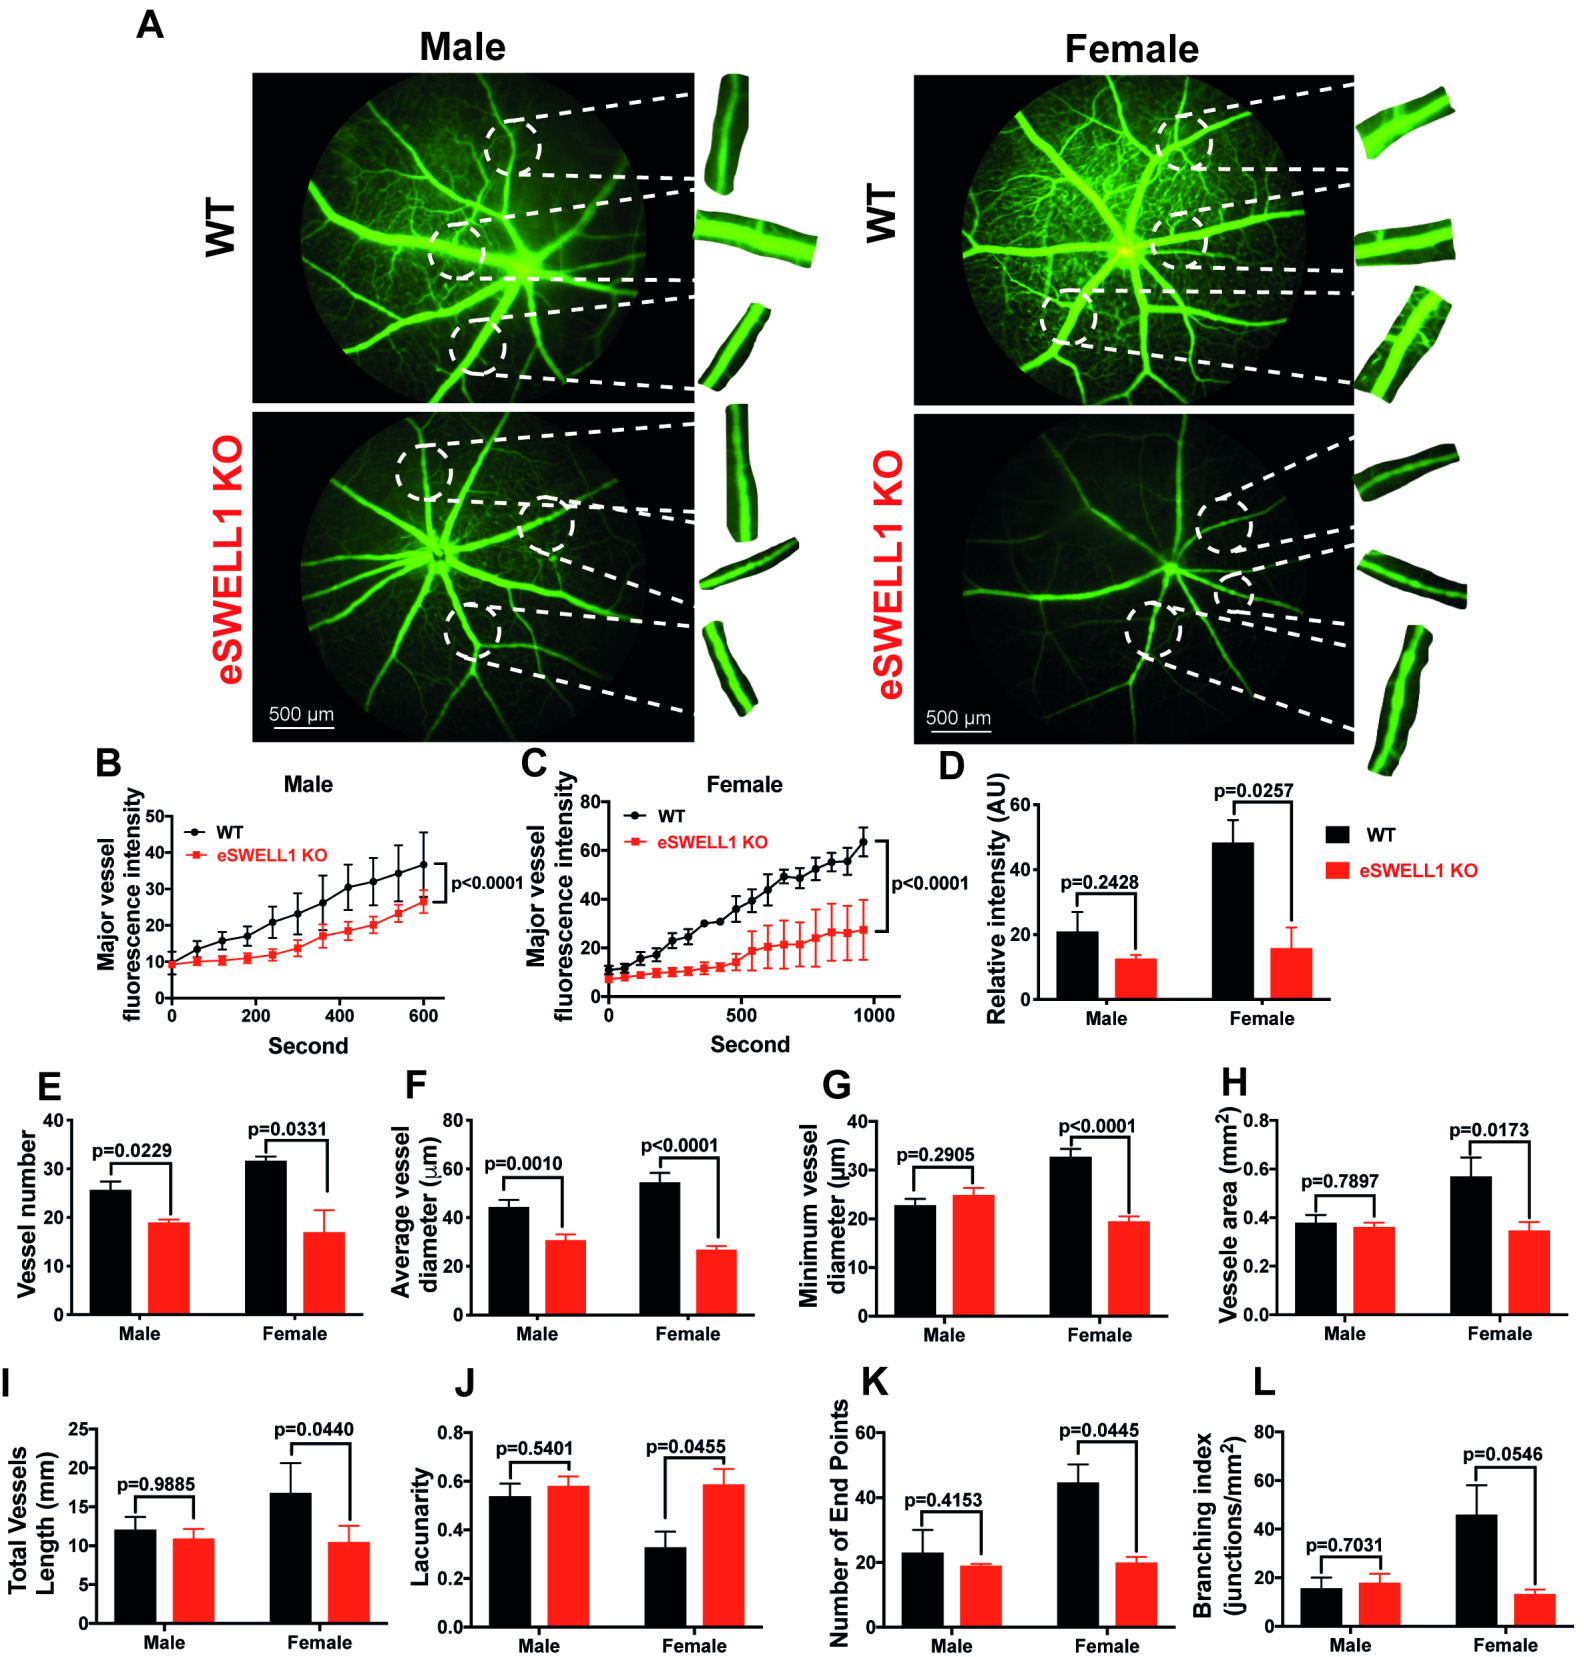

**Figure 8. Endothelium-specific SWELL1 KO mice exhibit exacerbated impairments retinal microvascular disease in the setting of Type 2 diabetes.**

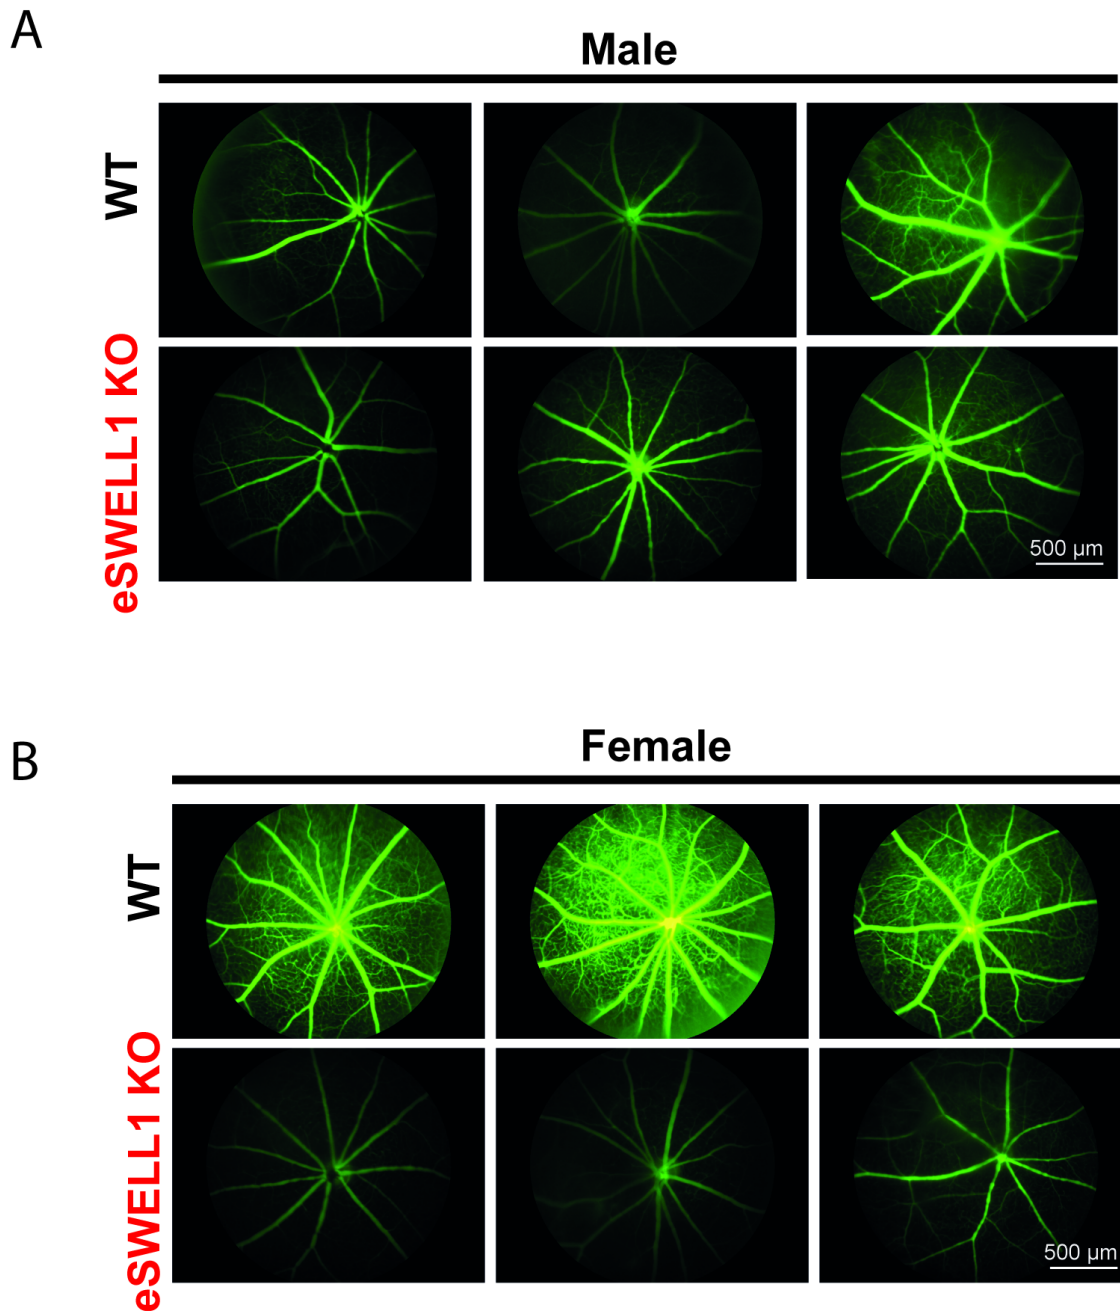

**Figure 8- Figure Supplement-2. Endothelium-specific SWELL1 KO mice exhibit exacerbated impairments retinal microvascular disease in the setting of Type 2 diabetes.**



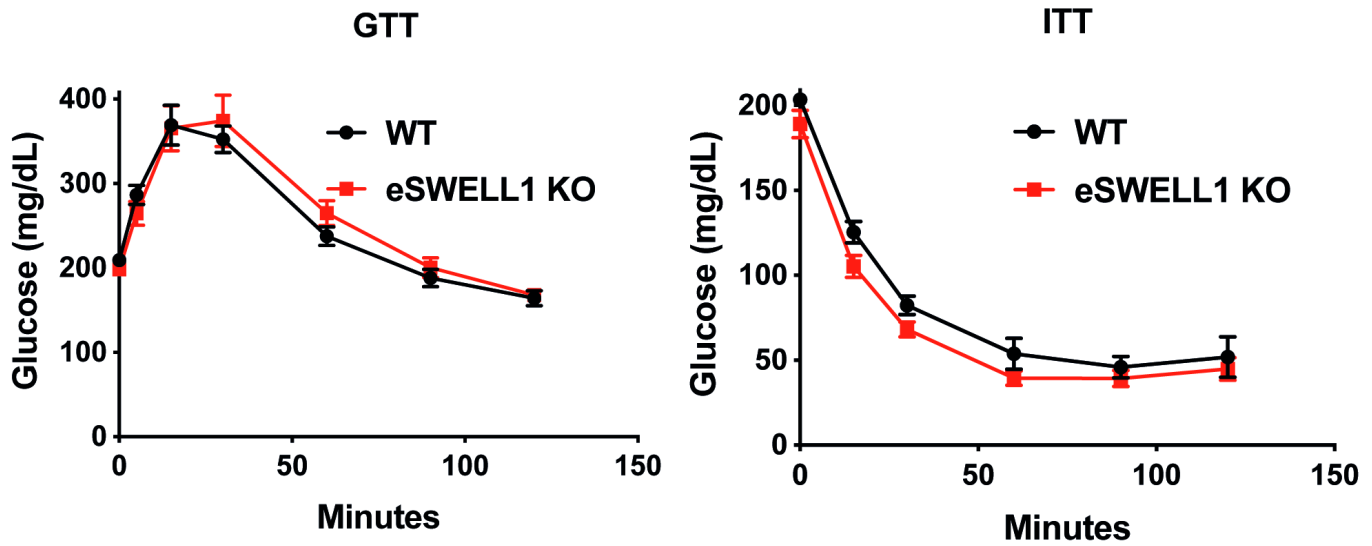

**Figure 8- Figure Supplement-3. Glucose tolerance (GTT) and insulin tolerance (ITT) are not altered in endothelium-specific SWELL1 KO mice (n = 13) compared to WT mice (n = 8) raised on a high-fat high sucrose diet for 10 months.**
